# Supplementary material
Source: PubMed Central journal article supplement (PMC5014570)
Supplement: NIHMS810284-supplement-1.pdf [file NIHMS810284-supplement-1.pdf]

## Supplemental Materials

|    |                                                                                                       |    |
|----|-------------------------------------------------------------------------------------------------------|----|
| 1  |                                                                                                       |    |
| 2  | <b>Table of Contents</b> .....                                                                        | 1  |
| 3  | <b>Supplementary methods</b> .....                                                                    | 3  |
| 4  | <b>Supplementary results</b> .....                                                                    | 10 |
| 5  | <b>Supplementary figures</b> .....                                                                    | 11 |
| 6  | Figure S1: Allograft survival for high vs. low CADI-12.....                                           | 11 |
| 7  | Figure S2: Workflow for bioinformatic data analysis.....                                              | 12 |
| 8  | Figure S3a-c: Identification of differentially expressed genes significantly associated with high 3-  |    |
| 9  | month or 12-month CADI using Spearman correlation analysis.....                                       | 13 |
| 10 | Figure S4a-b: Gene Ontology <b>and immune cell type analysis</b> of genes associated with CADI-m3 and |    |
| 11 | CAD-m12.....                                                                                          | 16 |
| 12 | Figure S5: Geneset Enrichment Analysis (GSEA) identified significant GO biological processes          |    |
| 13 | associated with high CADI-3 and CADI-12.....                                                          | 18 |
| 14 | Figure S6: <b>Cross-validation and permutation validation of the 13 geneset</b> .....                 | 19 |
| 15 | Figure S7: ROC curves for high/low CADI-12 prediction at higher CADI-12 cutoffs.....                  | 20 |
| 16 | Figure S8: ROC curves of prediction for fibrosis by Banff criteria (Ci+Ct scores), IFTA and on        |    |
| 17 | patients without ACR using the 13 geneset.....                                                        | 21 |
| 18 | Figure S9: <b>Prediction of kidney function with the 13 geneset</b> .....                             | 22 |
| 19 | Figure S10: Prediction of progressor and non-progressor with 13 geneset.....                          | 23 |
| 20 | Figure S11: Allograft survival for progressors and non-progressors.....                               | 24 |
| 21 | <b>Supplementary tables</b> .....                                                                     | 25 |
| 22 | Table S1: Demographic and clinical characteristics for GoCAR qPCR validation cohorts.....             | 25 |
| 23 | Table S2: The <b>84</b> focus geneset.....                                                            | 26 |
| 24 | Table S3: Multivariate analysis of clinical variable and geneset prediction of CADI-12.....           | 29 |
| 25 | Table S4: CADI subscore comparisons between progressor /non-progressor.....                           | 30 |
| 26 | Table S5: Multivariate analysis of m12 and m24 progressor/non-progressor prediction with clinical     |    |
| 27 | parameters and geneset.....                                                                           | 31 |
| 28 | Table S6: Association of 10 principle components of 13 geneset with graft loss in Cox proportional    |    |
| 29 | hazard model.....                                                                                     | 33 |
| 30 | Table S7: Association of demographic or clinical variables with graft loss in Cox proportional hazard |    |
| 31 | mode.....                                                                                             | 34 |
| 32 | Table S8: Validation of the GoCAR geneset in other kidney transplant cohort.....                      | 35 |
| 33 | <b>References</b> .....                                                                               | 36 |
| 34 |                                                                                                       |    |

35 **Supplementary methods:**

36 **Clinical Data Collection**

37 Donor and recipient data were collected at baseline. Donor information included age, race, gender,  
38 HLA genotype, cause of death, and graft status (i.e. SCD, ECD, or DCD). Recipient data included age,  
39 gender, race, cause of ESRD, HLA genotype, PRA, presence and type of anti-HLA antibodies, cross  
40 match status, cold ischemia time (CIT), delayed graft function (DGF), immunosuppression regimen,  
41 CMV status, HCV and HBV status, dialysis vintage, dialysis modality, transfusion history, pregnancy  
42 history, and previous transplants **We have adhered to the STROBE checklist throughout the manuscript.**  
43 **The clinical data from 5 different clinical centers were deposited into a central clinical eRAP database**  
44 **developed at Mount Sinai.**

45

46 **Histopathology:**

47 2 tissue cores were taken from each of the 3-month and 1 year protocol renal biopsies of the  
48 Genomics of Chronic Allograft Rejection (GoCAR) cohort. One core was processed for histology and the  
49 other core was processed for mRNA. When only one core could be obtained priority was given to mRNA  
50 at 3-months and to histology at 12-months. Renal biopsies were processed and read centrally. Formalin-  
51 fixed, paraffin-embedded sections were processed for histologic stains (hematoxylin and eosin, periodic  
52 acid Schiff, trichrome and Weigerts elastic stains). Immunohistochemistry for C4d was done on an  
53 automated stainer on paraffin sections stained with a rabbit polyclonal antibody (American Research  
54 Products, Inc.). All slides were scanned with a whole slide scanner (Aperio CS) and high-resolution  
55 digital images and archived in an image database.

56 Biopsies were evaluated and scored separately by 2 renal pathologists, without knowledge of the  
57 clinical data, using the Revised Banff 2007 Classification for Renal Allograft Pathology<sup>1</sup> (SIS reference).  
58 Where diagnoses were discordant, a meeting was held with a third pathologist for a consensus diagnosis.

59 Scoring was done on the whole slide images for all cases. Scores were entered into a custom Filemaker  
60 Pro database that calculated the Banff categories and Chronic Allograft Damage Index (CADI). The  
61 CADI-score is a composite score that includes six histologic components – vascular intimal sclerosis (cv),  
62 tubular atrophy (ct), interstitial fibrosis (ci), interstitial inflammation (i), mesangial matrix increase (mm)  
63 and glomerulosclerosis (g). Each component is scored between 0 & 3, giving a maximum possible score of  
64 18. CADI-scores in protocol biopsies has been validated to directly correlate with outcomes by several  
65 authors<sup>2-3</sup>.

66 Definition of "protocol biopsy" is that the biopsy is performed for the study or as part of a  
67 standard protocol at a given site in which a biopsy is performed based on time post-transplant and not  
68 based on an increase in creatinine or change in clinical status.

69 *Treatment of Censored data:* For analysis for histological outcomes, patients without 12-month  
70 biopsies were excluded from analysis. For analysis of functional outcomes or eGFR - we imputed a GFR  
71 of 10 ml/min for all death-censored graft losses. For analysis of graft survival via Kaplan-Meier, we  
72 censored patients whose follow up data became unavailable at respective time points, whereas patients  
73 who had "events" (ie graft-loss) were censored at the time of the event.

#### 74 **Microarray experiments**

75 The graft biopsies from 5 participating centers were sent to Mount Sinai and were stabilized with  
76 RNA-later(Qiagen, Inc). Total RNA was extracted from percutaneous graft biopsy samples obtained at 3  
77 month after transplantation using All prep kit (QIAGEN-ALLprep kit, Valencia, CA USA) by one  
78 technician at Mount Sinai. RNA quality was assessed using Bioanalyzer 2100 (Agilent Technologies).  
79 Samples with an RNA Integrity Number greater than eight were used in subsequent microarray  
80 experiments. Affymetrix humanexon 1.0 ST arrays were used following standard protocol provided by  
81 the manufacturer (Affymetrix Inc.). In brief, ENCORE amplification and labeling kit (NuGen, San Carlos,  
82 CA) was applied to the first batch of samples starting with approximately 100ng of total RNA to generate

83 biotin-labeled RNA fragments for hybridization to the chip. For samples with a low RNA concentration,  
84 the Nugen Ovation PICO amplification kit (NuGen, San Carlos, CA) was applied. The chips were  
85 scanned using GeneChip Scanner 7G (Affymetrix Inc.). The Affymetrix genechip experiments were  
86 performed at Mount Sinai Microarray Core.

### 87 **Microarray data processing**

88 The intensity data of microarray experiments at the gene level were extracted and summarized  
89 with the RMA algorithm<sup>4</sup>. Data quality was assessed using the Affymetrix Expression Console  
90 (Affymetrix Inc). The Affymetrix control probesets and probesets with a low intensity (less than 20%  
91 quantile among all the data points) across all samples were excluded from downstream analysis. Batch  
92 effects were adjusted using the ComBat R package<sup>5</sup>.

### 93 **Bioinformatic analyses**

94 The workflow of bioinformatic analysis is depicted in Suppl. Fig 3. and the analysis was  
95 performed with statistical R packages. The goal of analyses was to derive a relatively robust set of genes  
96 (~10-20) that predicts the development of chronic graft nephropathy.

97 *Identification of the graft transcriptional signature:* Spearman correlation analyses were performed on the  
98 3-month graft gene expression data for 3-month graft CADI score (CADI-3) as well as 12-month CADI  
99 score (CADI-12). The correlation coefficient and the p-value for the relationship between the level of  
100 expression and CADI score were calculated for each gene. The slope of gene expression against the  
101 CADI score was also computed using a linear regression model. Genes with a p value of < 0.05 were  
102 selected. Two lists of genes with p<0.05 were generated corresponding to either the 3 month or 12 month  
103 CADI scores. Annotated functional and molecular mechanisms of these 2lists of genes were determined  
104 by Gene Ontology (GO) enrichment analysis based on Fisher-exact test. **To investigate which immune**  
105 **cell type genes are associated with CADI-3 or CADI-12, we downloaded the public expression data of**  
106 **various immune cell types (<https://www.immgen.org/>) and identified highly expressed genes for each**  
107 **immune cell type by the rank of gene expression across cell types. We then checked which immune cell**  
108 **types are correlated with CADI-3 or CADI-12 based on the enrichment of immune cell type genes.**

109 Alternatively, the gene expression dataset was analyzed to determine biological functions that are  
110 enriched in biopsies with higher CADI scores. To accomplish this, we applied Geneset Enrichment  
111 Analysis (GSEA)<sup>6-7</sup> to the entire microarray dataset and determined gene functions that are enriched in  
112 samples with a high CADI score ( $CADI \geq 2$ ) versus those with a low CADI score ( $CADI < 2$ ). Top GO  
113 terms associated with both the high and low CADI groups were determined, and compared to the results  
114 of GO enrichment analysis derived from the analyses of correlation between gene expression level and  
115 CADI score described above.

116 *Prediction analysis:*

117 To derive a more significant and focused geneset from the large list of genes that have  
118 statistically significant association with CADI-3 or CADI-12 scores, we filtered the gene list by applying  
119 various statistical prediction models. First, the whole cohort of patients was randomly assigned to 2  
120 groups in a 1:1 ratio. Spearman correlation analysis was applied to determine the genes with expressions  
121 levels that correlated with the severity of CADI score at 3 and 12 months. The 1:1 randomization was  
122 repeated 100 times and correlation analysis of gene expression with CADI score at 3 and 12 month was  
123 performed for each of the 100 iterations. We considered genes that occurred more than twice in the 100  
124 iterations of randomization with a correlation at a  $P < 0.05$  with CADI in both groups as a focused geneset  
125 from which a minimal prediction set was identified for predicting kidney fibrosis. Genes that were  
126 exclusive to the CADI-12 focus geneset (i.e. genes not shared with the CADI-3 focus geneset) were  
127 derived and further filtered by correction for clinical confounders (donor age, living vs deceased donor,  
128 donor gender and race, cold ischemia time(CIT, minutes), induction therapy, anti HLA class I, and II  
129 antibodies) using multiple linear regression analysis, as well as exclusion of genes with a low median  
130  $\log_2$  intensity of less than 5.

131 Finally, we performed iterative logistic model fitting (5000 iterations) in order to identify an  
132 optimal and minimal geneset for prediction of future kidney fibrosis. We started by randomly selecting 20  
133 genes from the filtered CADI-12 focus geneset. The expression data of the 20-gene group was fitted into

134 | **Firth-type bias-reduced logistic regression model which panelizes the maximum likelihood<sup>8 9</sup> in logistf** |

135 R package for prediction of high (CADI-12  $\geq 2$ ) and low (CADI-12  $< 2$ ) CADI-12. We used a CADI-12 cutoff  
136 of  $\geq 2.0$  to derive our prediction geneset. The paper we referenced by Yilmaz<sup>2</sup> also evaluated protocol  
137 biopsies at 1 year and divided their biopsies into 3 groups  $< 2$ , 2-3.9 and  $> 4$ . Whilst a CADI score  $> 4$  had  
138 the strongest association with graft loss, those with a CADI score of 2-3.9, were also associated with graft  
139 loss where as those with a score  $< 2$  did not. We selected a CADI-12  $\geq 2$  based on this prior publication<sup>3</sup>.  
140 The genes with significant association with high/low CADI-12 ( $p < 0.05$ ) were identified from the  
141 regression model for each of the 20-gene group. The steps above were repeated 5000 times. Statistically  
142 significant genes ( $P < 0.05$ ) were identified from each iterative operation. The occurrence of significant  
143 genes from the 5000 iterations was calculated. Finally, the top 40 genes ranked by the number of  
144 occurrences were applied back to the penalized logistic regression model for high vs. low CADI-12  
145 prediction. Statistically significant genes ( $P < 0.05$ ) using this model were considered the final optimal  
146 geneset. The AUC score and sensitivity and specificity were calculated from logistic regression model  
147 using the final optimal geneset. To investigate the overfitting issues of prediction of training set with the  
148 geneset, cross-validated prediction AUC was also calculated using a 3-fold cross-validation method.  
149 Briefly, the patients were randomly divided into 3 groups of equal size and equal number of high and low  
150 CADI-12 patients and the data for any 2 groups were used as the training set with the third as the  
151 prediction set. The penalized logistic regression model that was built on the training set was applied on  
152 the prediction set to predict the outcome and the true and false positive rates. Prediction accuracy was  
153 calculated from the prediction data set and then averaged from three possible permutations. We repeated  
154 the steps over 100 times. The overall true or false positive rates and prediction accuracy were computed.  
155 The distribution of AUCs on the testing set based on the model derived using the training set for 100  
156 iterations was plotted.

157 To assess if the geneset we identified was an optimal geneset for high/low CADI-12 prediction,  
158 we compared the original prediction AUC with prediction AUCs from the genesets that were identified  
159 from high/low CADI-12 groups after 2000-time random re-shuffling of CADI-12 scores. Briefly, CADI-  
160 12 scores were randomly re-assigned to the patients, the prediction geneset from re-shuffled high/low

161 CAD-12 groups was identified in the same approach as for original CADI-12 groups and the AUC was  
162 therefore calculated. These steps were repeated 2000 times and the original AUC was compared to the  
163 1000 AUCs from randomly-assigned CADI-12 groups.

164 Our geneset identification and prediction approach was further fully cross-validated with leave-  
165 one-out cross-validation algorithm. Briefly, we took one patient as validation set and the remaining  
166 patients as training set and identified new geneset from training set in the same approach as for original  
167 cohort. The logistic model built on training set with new geneset was then applied to the patient that was  
168 left out and the prediction probability was calculated. These steps were repeated in all the possible ways  
169 of selecting training and testing sets and ROC curve was drawn based on the probabilities of testing sets  
170 from all iterations.

171 Prediction of high/low CADI-12 at a different threshold (high CADI-12 $\geq$ 3 or high CADI-12  $\geq$ 4)  
172 was also performed to assess the robustness of 13 geneset prediction. To check if the inflammation was  
173 the driver of the 13 geneset, we evaluated the prediction of Banff criteria (Ci+Ct scores), IFTA and high  
174 CADI-12 on the patients without acute rejection. Lastly we investigated if the geneset can predict the  
175 kidney function and we calculated prediction AUC of eGFR at 12 month or 24 month with geneset.

176 To investigate whether prediction by the geneset is superior to prediction by clinical variables, we  
177 performed the multivariate logistic regression for prediction of high/low CADI-12 by including the  
178 following demographic/clinical variables: donor age, recipient race and gender, deceased donor status,  
179 extended-criteria donor kidney, cold ischemia time (CIT, minutes), induction therapy, presence of Anti-  
180 HLA antibodies, delayed graft function and HLA mismatch. After step-wise selection, the variables that  
181 remained significant were used in final model. The AUC for the ROC curve of the final model was then  
182 calculated and compared to CADI-12 prediction with the geneset.

183 We also applied our optimal geneset to predict the progressors and non-progressors using the  
184 same approach described above. Patients who had CADI-3 $\leq$ 3 and demonstrated a  $\Delta$ CADI $\geq$ 2 by 12 month  
185 were considered as progressors, and those who had  $\Delta$ CADI  $\leq$ 1 were considered non-progressors. A

186 similar assessments were done for those with CADI score at 24 months and also for the patients with  
187 CADI-3 $\leq$ 2.

188 To test if our geneset could predict early graft loss post-transplant for the original 159 patients,  
189 we applied logistic regression prediction model with our geneset among only those patients who either  
190 had graft loss within 3yr or had been followed-up for at least three years without graft loss and calculated  
191 the AUC. Secondly, survival analysis on all 159 patients was performed to examine if our geneset was  
192 associated with graft loss: to assess the association of the whole geneset with clinical outcome, the major  
193 principle components of the expression data of the geneset rather than individual genes can be used to fit  
194 an association statistic model along with clinical parameters, especially in the case where the geneset  
195 contains many genes<sup>10-11</sup>. In this study, we initially performed Principle Components Analysis (PCA) on  
196 expression data for the 13 genes and the top 10 principle components (PC) were applied to Cox  
197 proportional hazard model of time to graft loss. The principle components (PC) that were significantly  
198 associated with graft loss were selected (  $p<0.05$ ) and the linear combination of eigenvalues of significant  
199 components multiplied by the coefficients of corresponding PCs from Cox model was used as the  
200 geneset risk score (GR-score). The patients were then stratified into 2populations based on geneset risk  
201 score (GR-score) for Kaplan-Meier survival analysis. Finally the time-dependent ROC for graft loss  
202 prediction within 2 or 3 yrs post-transplant was plotted and the AUCs calculated. The demographic and  
203 clinical variables, including 3-month estimated glomerular filtration rate (m3\_eGFR), acute cellular  
204 rejection at- or before 3-months (pre\_or\_m3\_ACR), CADI-3, cold ischemia time (CIT, minutes),  
205 deceased donor status, the presence of Anti-HLA antibodies, induction therapy, recipient race,donor age,  
206 **delayed graft function and HLA mismatch** were also fitted in Cox proportional hazard model of time to  
207 graft loss to investigate if the demographic or clinical variables were associated with graft loss.

208

209 **Validation of Geneset:**



210 We also validated our final optimal geneset on 2 independent public datasets. Both public datasets  
211 were on the Affymetrix GeneChip platform HU430plus2 (GSE21374<sup>12</sup>, GSE25902<sup>13</sup>). The raw data of  
212 these public datasets were processed **separately** in Affymetrix Expression Console using the RMA  
213 normalization approach. The expression data for each of the genes in our final optimal geneset was  
214 extracted and a prediction model with the geneset was built **on each individual dataset**. Predictions of  
215 clinical data (graft loss post biopsy at any time for GSE21374, and progressor/non-progressor based on  
216 CADI score for GSE25902) was performed using the penalized logistic regression model. AUC scores for  
217 each of these 2 datasets were calculated from the ROC curves for prediction specificity over sensitivity.  
218 We also performed time to graft loss analysis on dataset1 ( GSE21374) using the same approach as that  
219 for GOCAR dataset.

220

#### 221 **qPCR experiments**

222 Total RNA was extracted from graft biopsy samples of 45 independent GOCAR patients (N=18:  
223 CADI-12  $\geq 2$ , and N=27:CADI-12  $< 2$ ) using Allprep kit (QIAGEN-ALLprep kit, Valencia, CA USA).  
224 cDNA was synthesized using AffinityScript RT kit with oligo DT primers (Agilent Inc. Santa Clara, CA).  
225 TaqMan qPCR assays for the 13 geneset, 2 house-keeping genes (ACTB, GAPDH) and 18s were  
226 purchased from ABI Life Technology (Grand Island, NY). qPCR experiments were performed on cDNA  
227 using TAQMAN universal mix and PCR reaction was monitored and acquired using an ABI7900HT  
228 system. Samples were measured in triplicates. Cycle Times (CT) values for the prediction geneset as well  
229 as the 3 housing genes were generated. The  $\Delta$ CT value of each gene was calculated by subtracting the  
230 average CT value for the house-keeping genes from the CT value of each gene and penalized logistic  
231 regression fitting model was then applied on  $\Delta$ CT values for prediction of the high and low CADI-12 in  
232 45 patients and AUC score was then calculated as described above.

233

234

235 **Supplementary results**

236 **Intragraft molecular phenotype is time dependent.**

237 Gene expression profiles from m3 biopsies were analyzed by correlation analysis and Geneset  
238 Enrichment Analysis (GSEA) to understand molecular mechanisms of IF/TA (Figure S2) (n=159). We  
239 identified 1127 genes significantly correlated with CADI-3 (716 positively and 411 negatively) and 1,143  
240 genes with CADI-12 (914 positively and 229 negatively) at a cutoff unadjusted  $p < 0.05$ , (Figure S3a, S3b  
241 and S3c). Only 230 genes (20.4%) correlated with both CADI-3 and CADI-12 (Figure S3a). Gene  
242 Ontology enrichment indicated that the transcripts specifically associated with CADI-3 alone were related  
243 to alloimmunity, including T-cell activation; while genes involved in programmed cell death/apoptosis  
244 and cell adhesion were associated with CADI-12 alone (Figure S4a). **By enrichment analysis of immune**  
245 **cell type genes, we observed that dendritic cell genes were specifically associated with CADI-3; however**  
246 **stromal cell genes (mostly fibroblast cells) were the most significantly associated with CADI-12 in**  
247 **addition to macrophage, dentritic and CD4 T cell related genes (Figure S4b).** Biological functions were  
248 further confirmed by GSEA method in which gene expression data in GO categories were compared  
249 between patients with high ( $\geq 2$ ) and low ( $< 2$ ) CADI at 3- or 12-months (Figure S5).

250

251

252

253

Figure S1

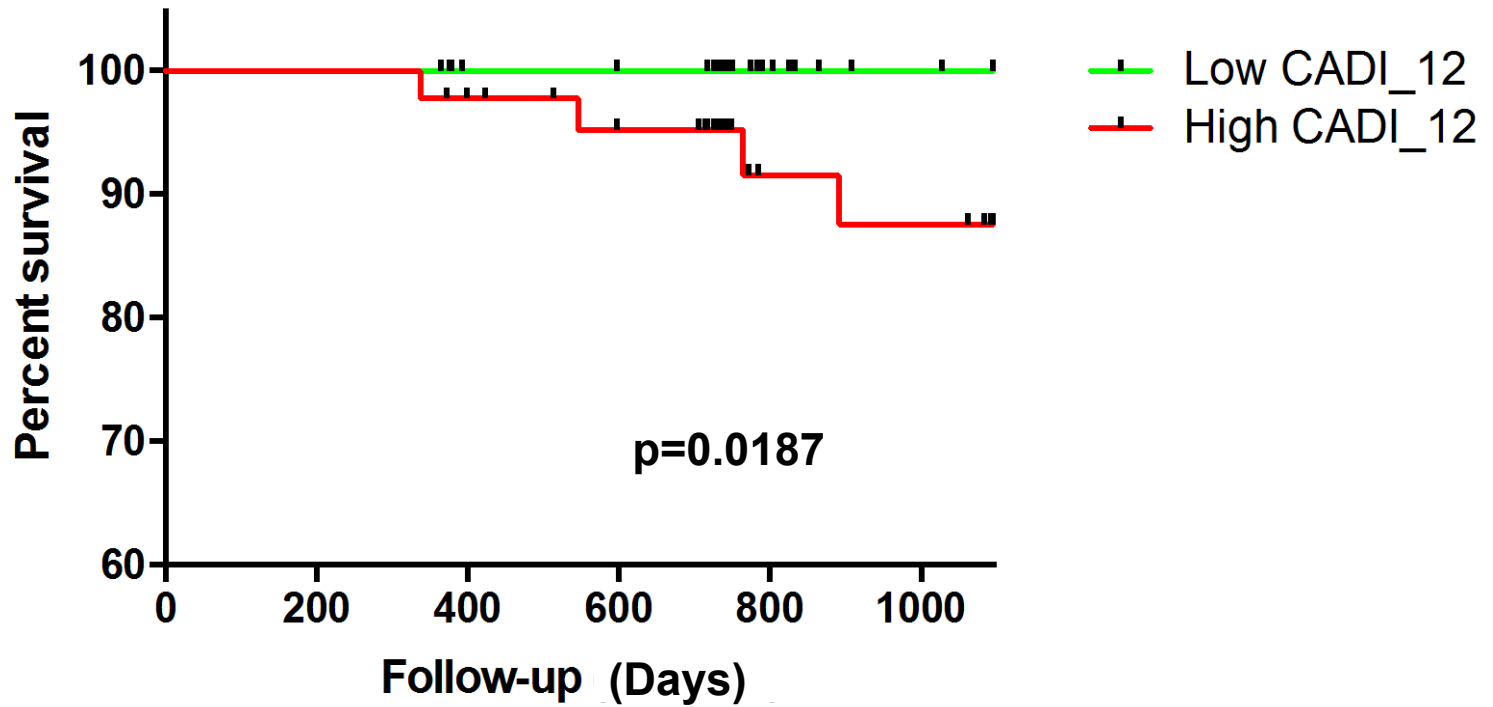

|               |    |    |    |    |    |    |
|---------------|----|----|----|----|----|----|
| High CADI-12: | 44 | 44 | 42 | 38 | 24 | 22 |
| Low CADI-12:  | 57 | 57 | 54 | 52 | 34 | 28 |

Figure S2

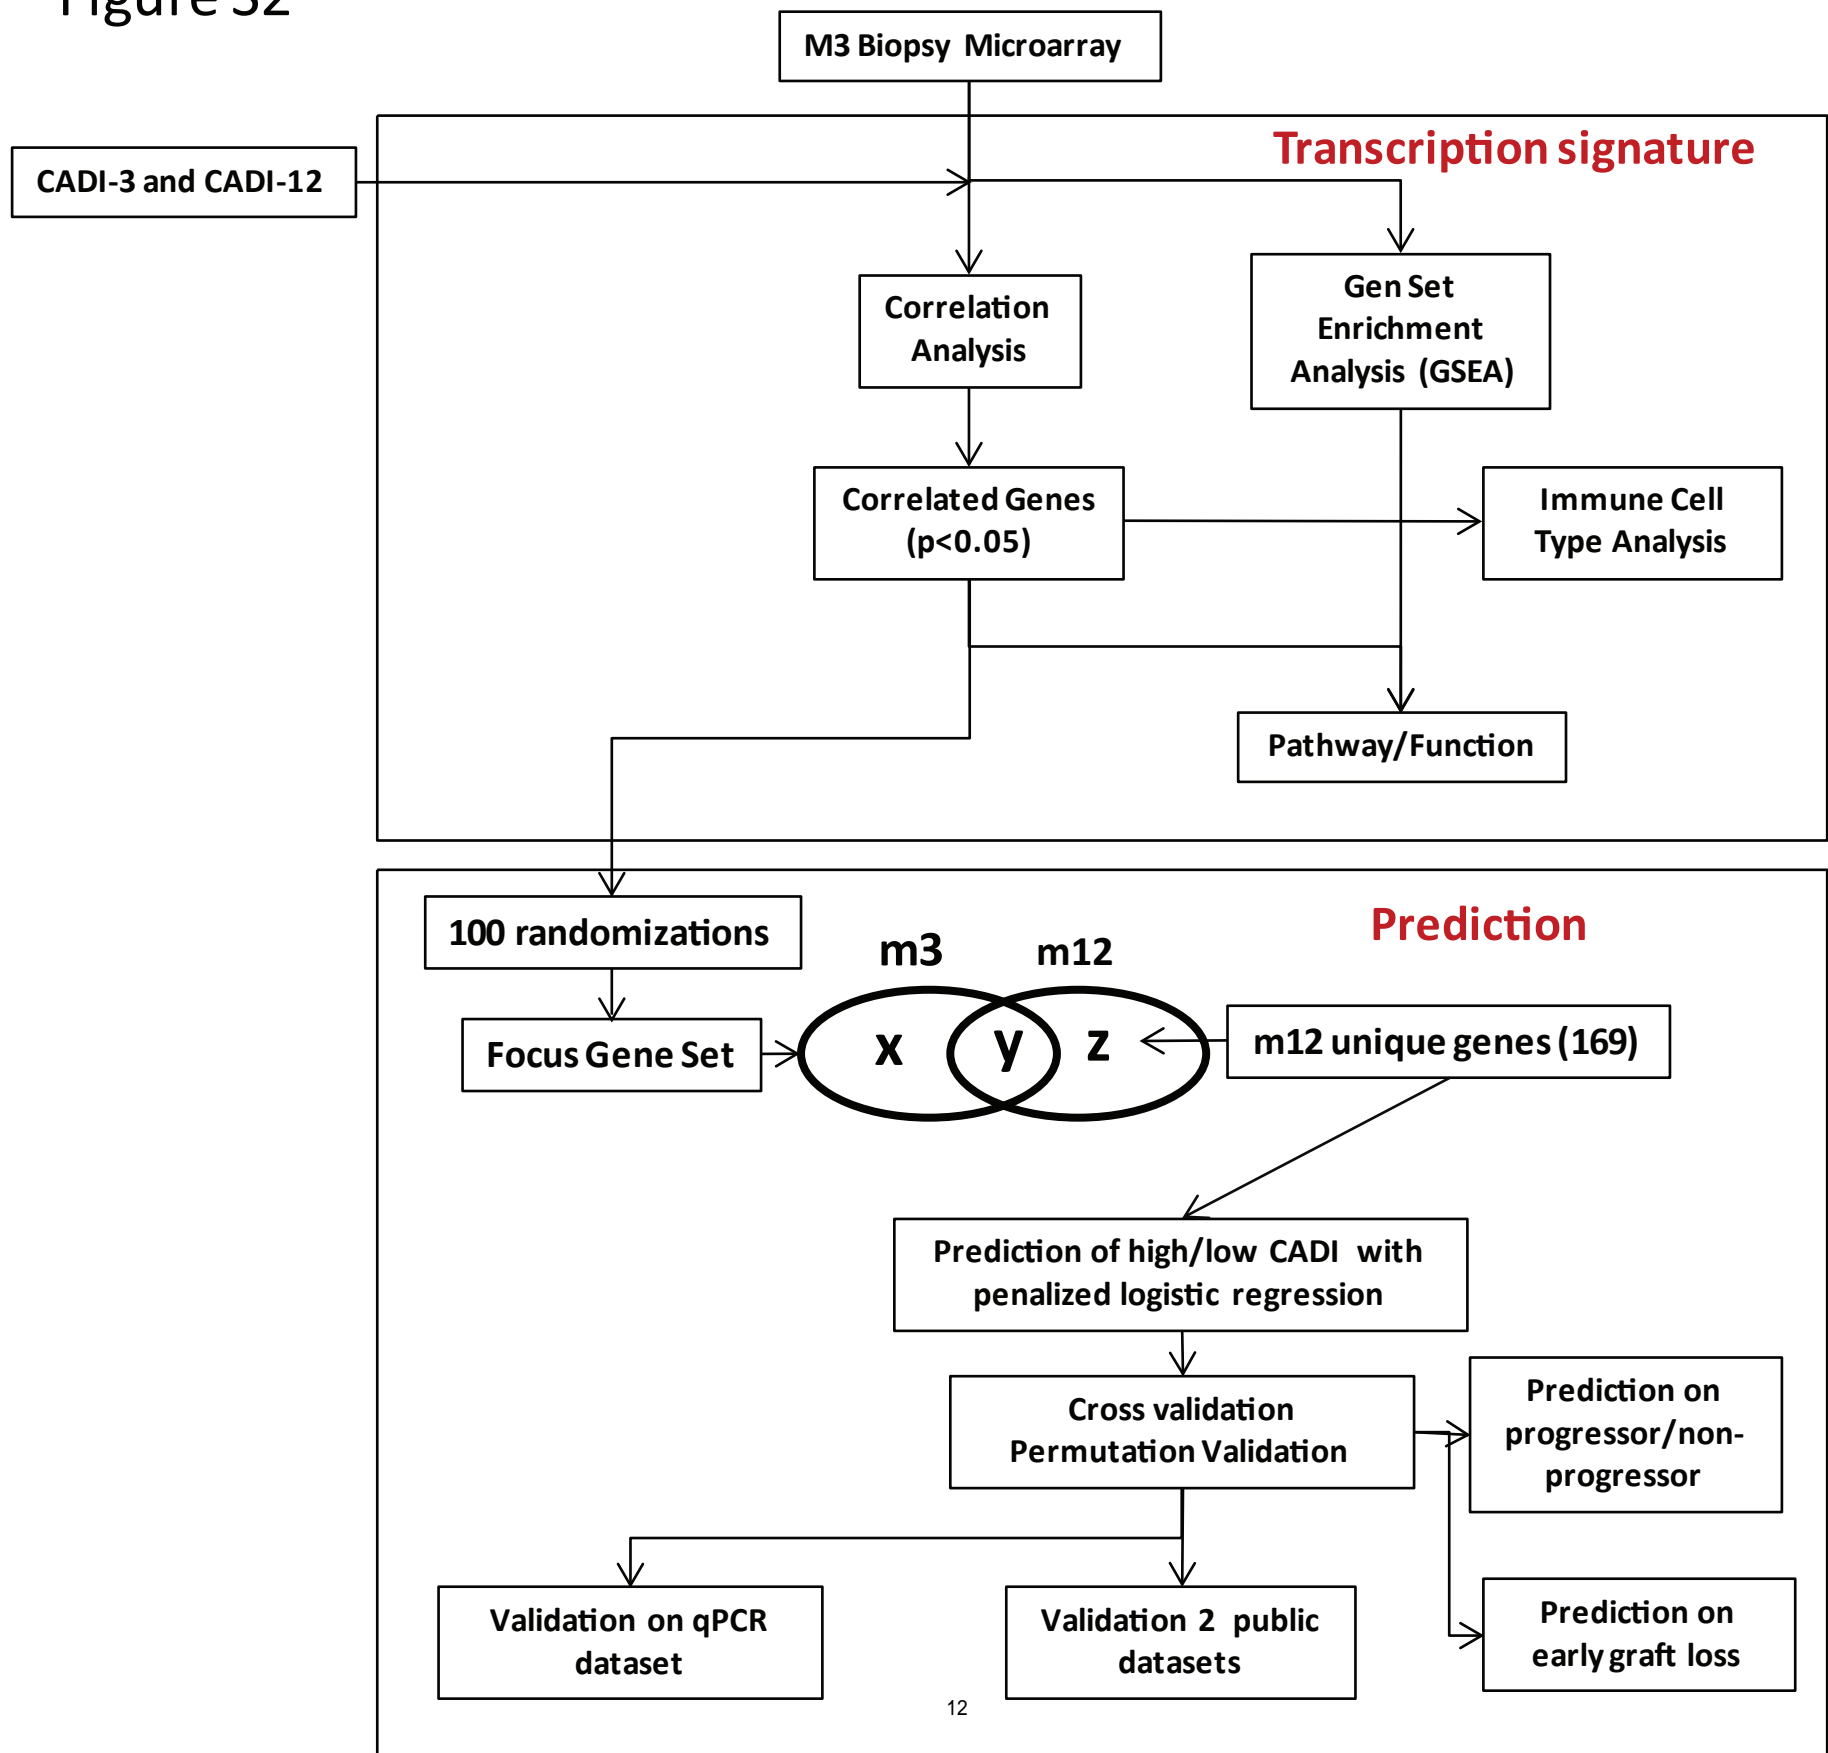

Figure S3a

| <b>CADI</b>   | <b>Spearman Correlation P&lt;0.05</b> | <b>Genes</b> | <b>Top 25 Genes</b>                                                                                                                                                                              |
|---------------|---------------------------------------|--------------|--------------------------------------------------------------------------------------------------------------------------------------------------------------------------------------------------|
| 3 month CADI  | Positive                              | 716          | IRF8, ALOX5, GABRP, GAPT, IKZF1, NUF2, PPM1M, ARNTL2, TOR1A, CPA3, BTK, CD180, ARL4C, CD200R1, PTPN22, ABCA12, APBB1IP, ITGB2, IGJ, C17orf87, ARG1, GNA15, GCNT1, AIM2, CLSPN                    |
|               | Negative                              | 411          | USP2, FLJ42875, GAD1, B3GNT9, NAPB, LOC100130232, CA12, EGF, SLC4A9, TTC18, ADHFE1, ZNF793, NCOA6, SERPINA5, F11, PER3, ZNF385B, RALGPS1, FREM1, FRAS1, SALL1, ATXN7L1, WNK1, NEDD4L, CYP4Z1     |
| 12 month CADI | Positive                              | 914          | MACC1, LAMC2, CHCHD10, CCL2, GABRP, DUSP6, PROM1, CDC42SE2, ARL4C, SLC34A2, ARPC5, GCNT3, DLGAP1, KLHL13, FJX1, LIX1, TES, HS3ST1, SFN, MET, ITGB6, CLU, HPGDS, CYR61, FAM110B                   |
|               | Negative                              | 229          | NHLH1, GPRC6A, TRPM6, LCE2D, SLC22A23, SORCS1, C11orf53, RXRA, PDK4, C7orf53, KANK1, KRT9, IRGC, C9orf84, NCKAP5, GOLGA2B, PCSK2, MGC13053, KREMEN1, TACC2, OR10A5, CCDC90A, PRM1, MT1B, C5orf45 |

Figure S3b

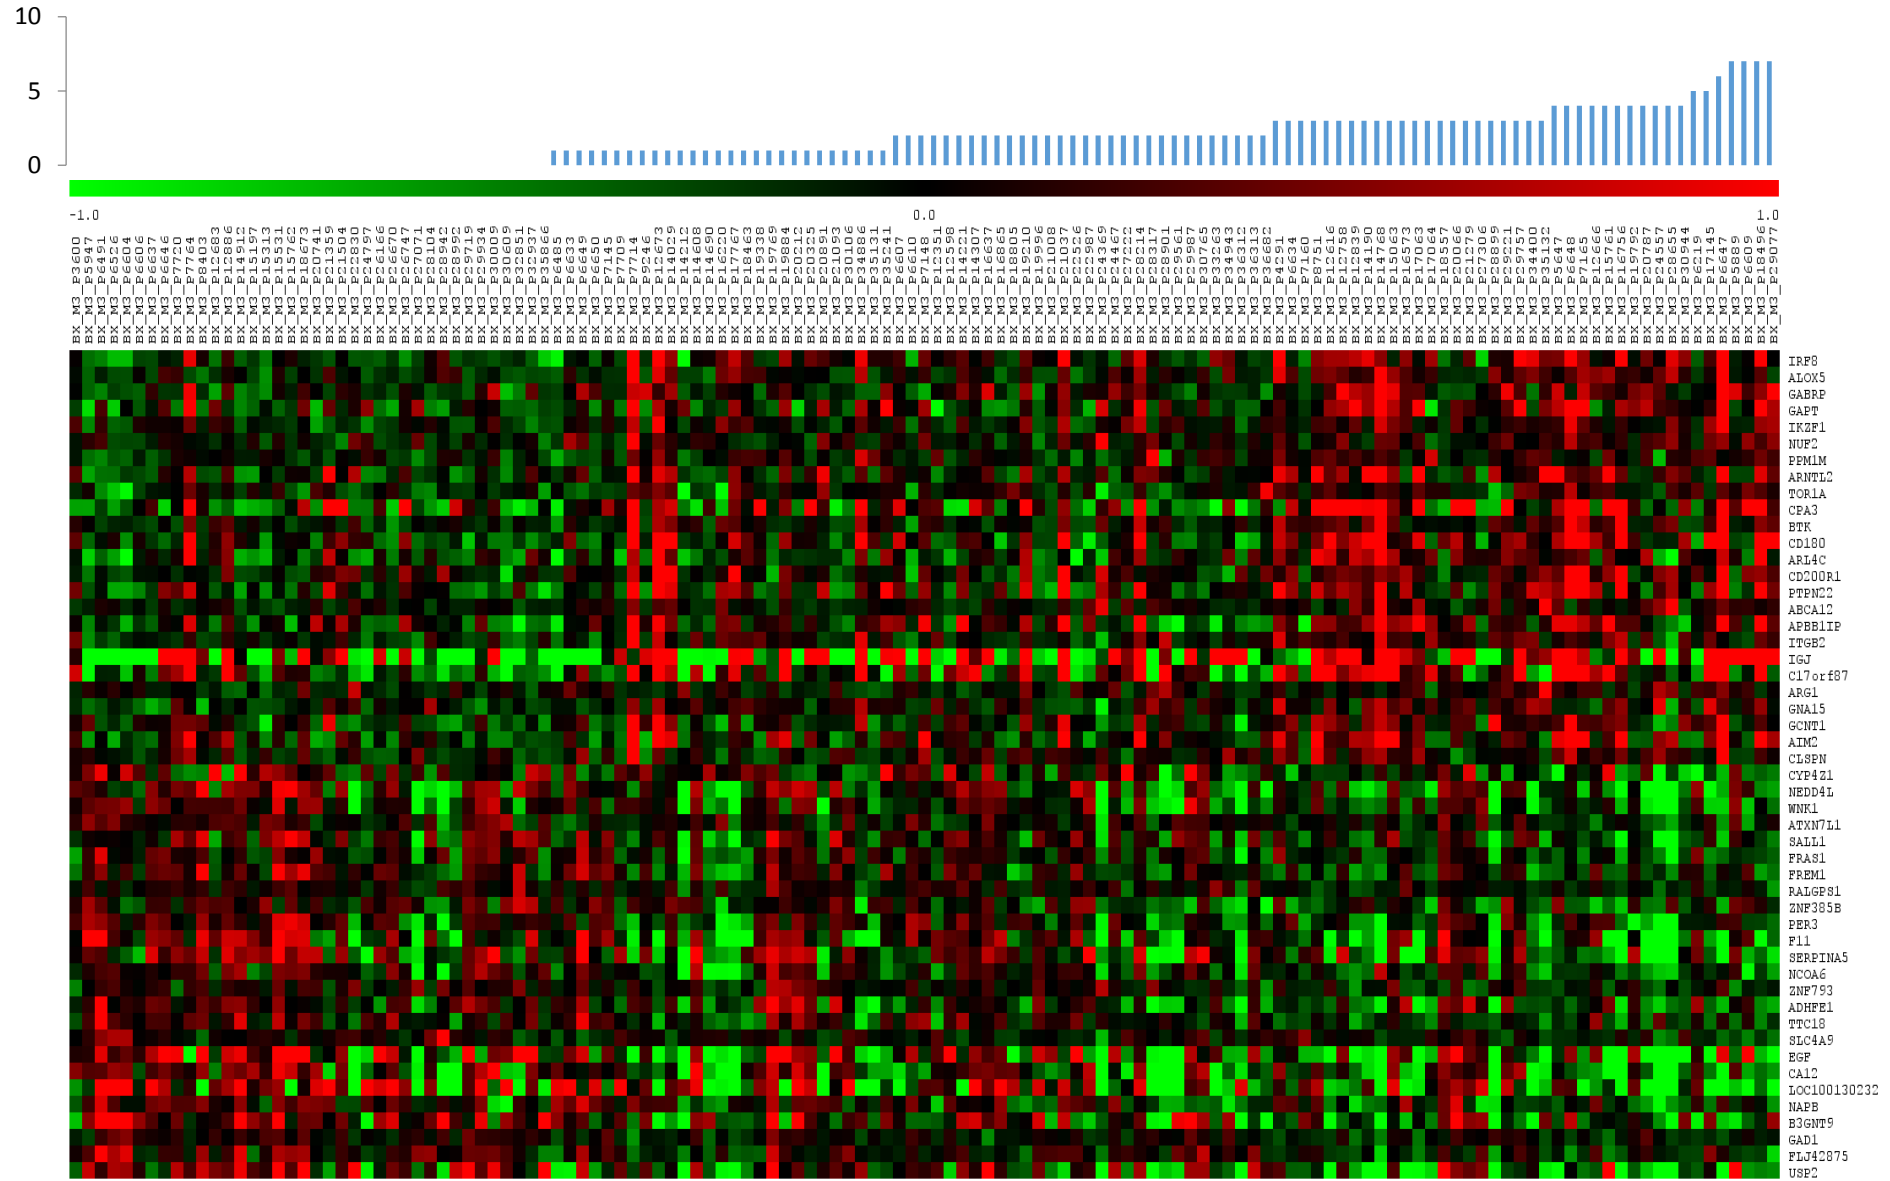

Figure S3c

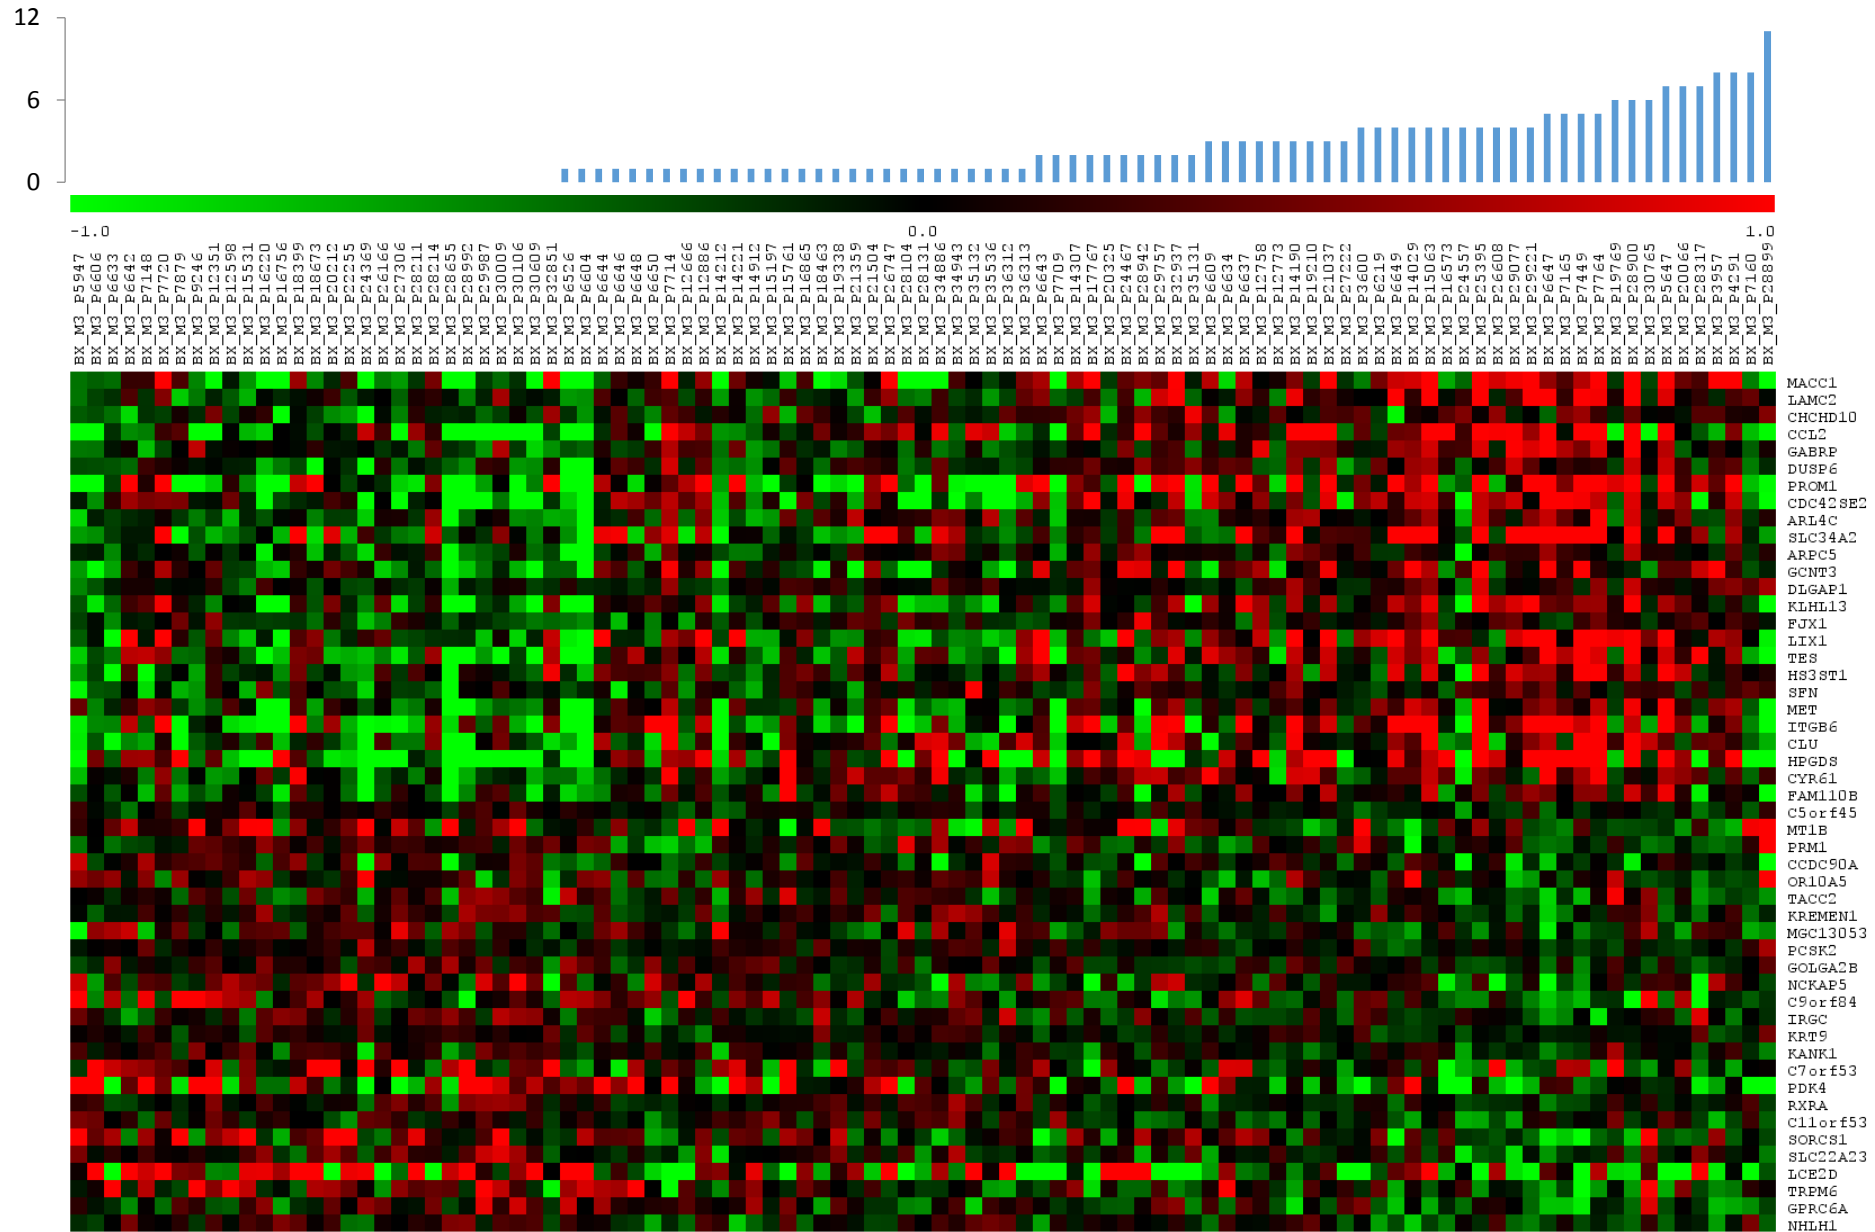

Figure S4a

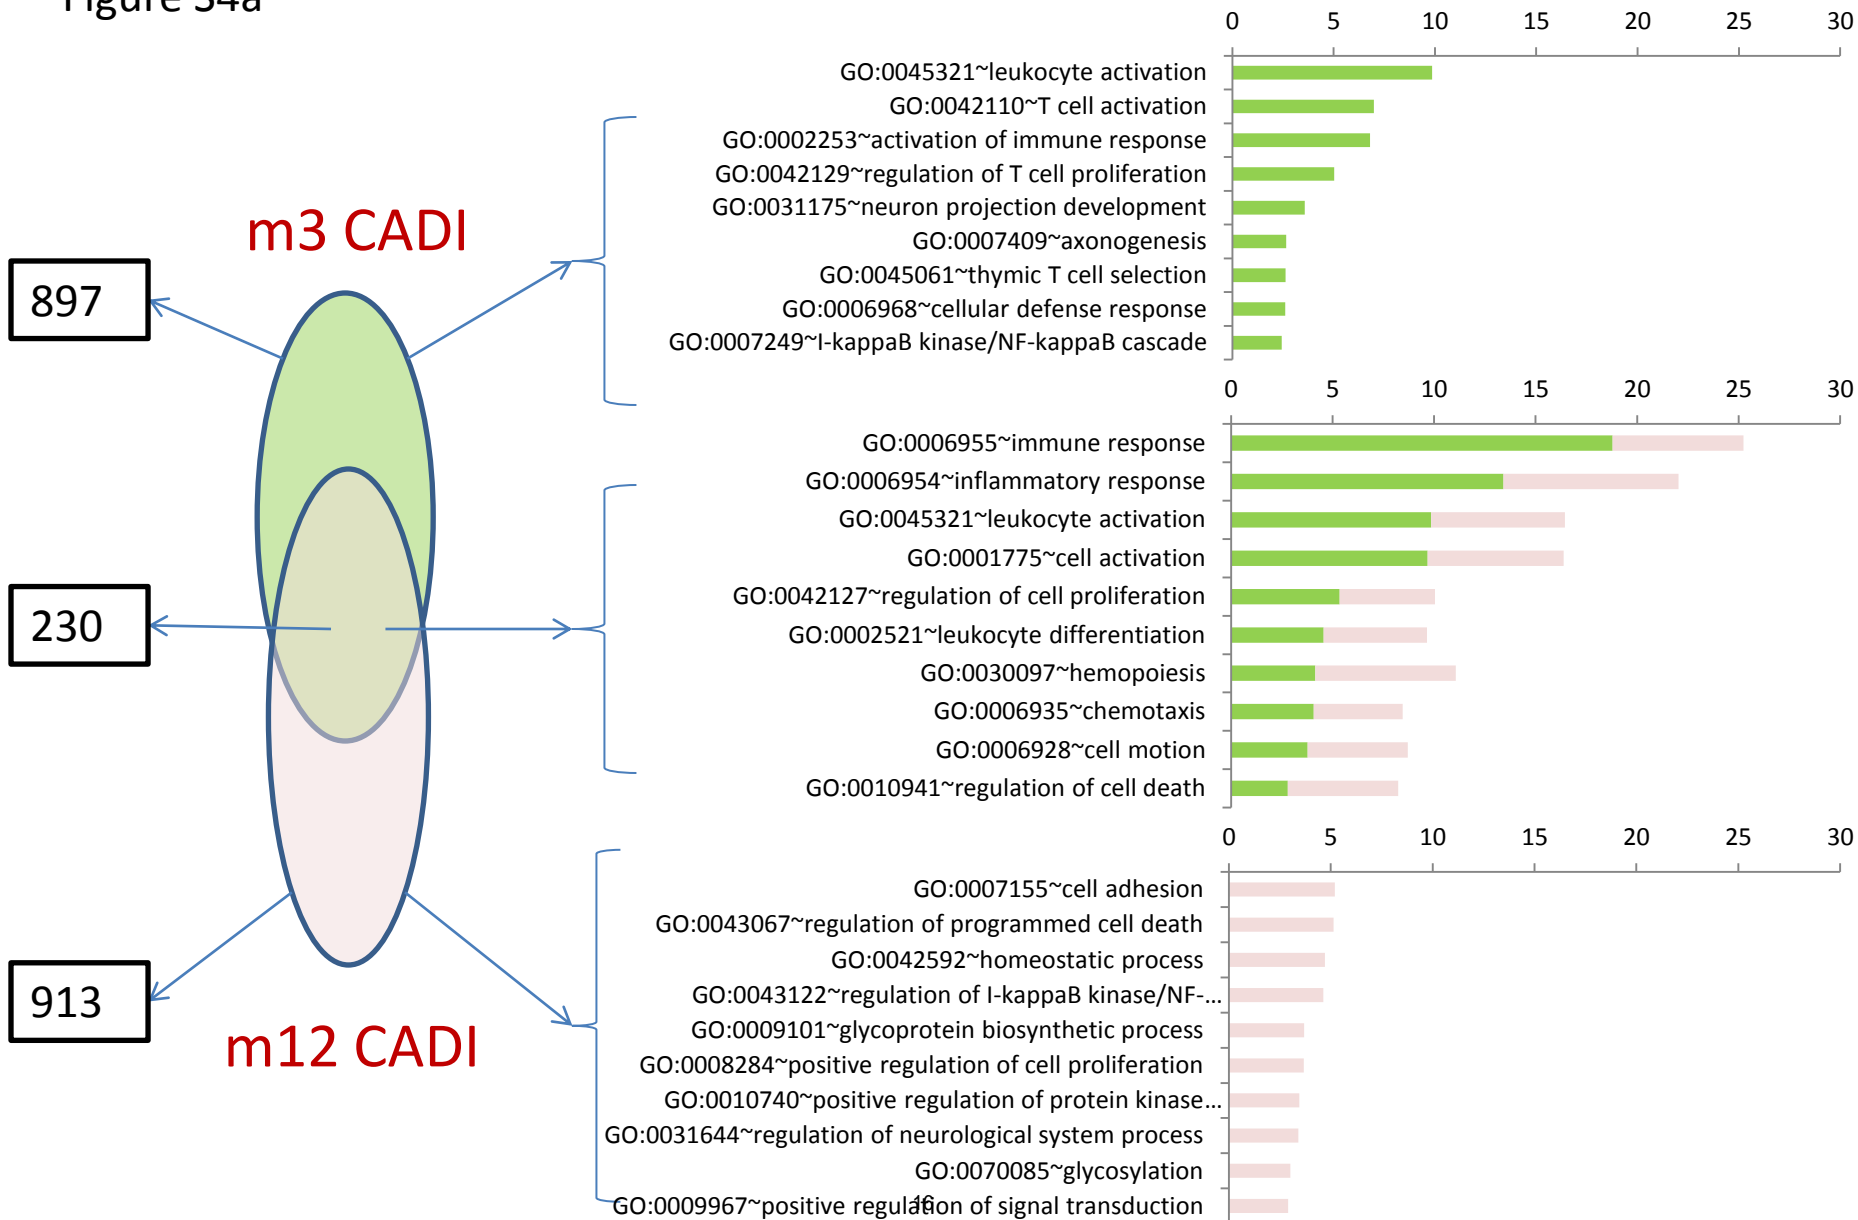



Figure s4b

3 month

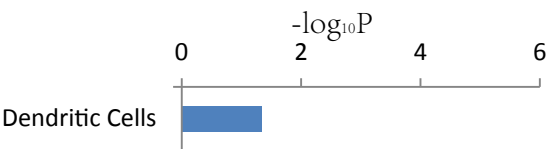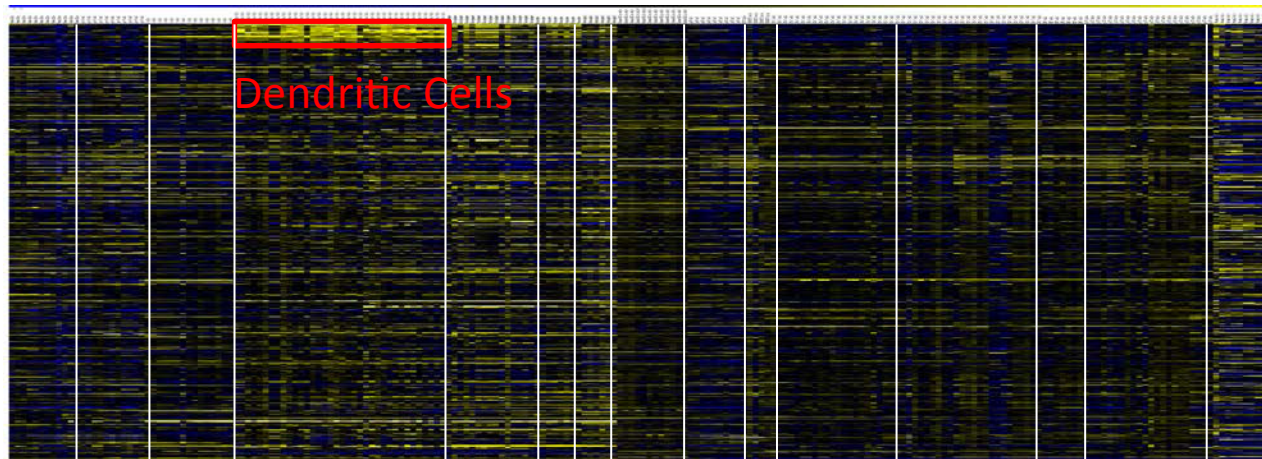

12 month

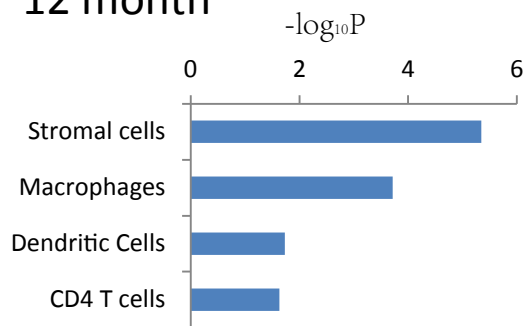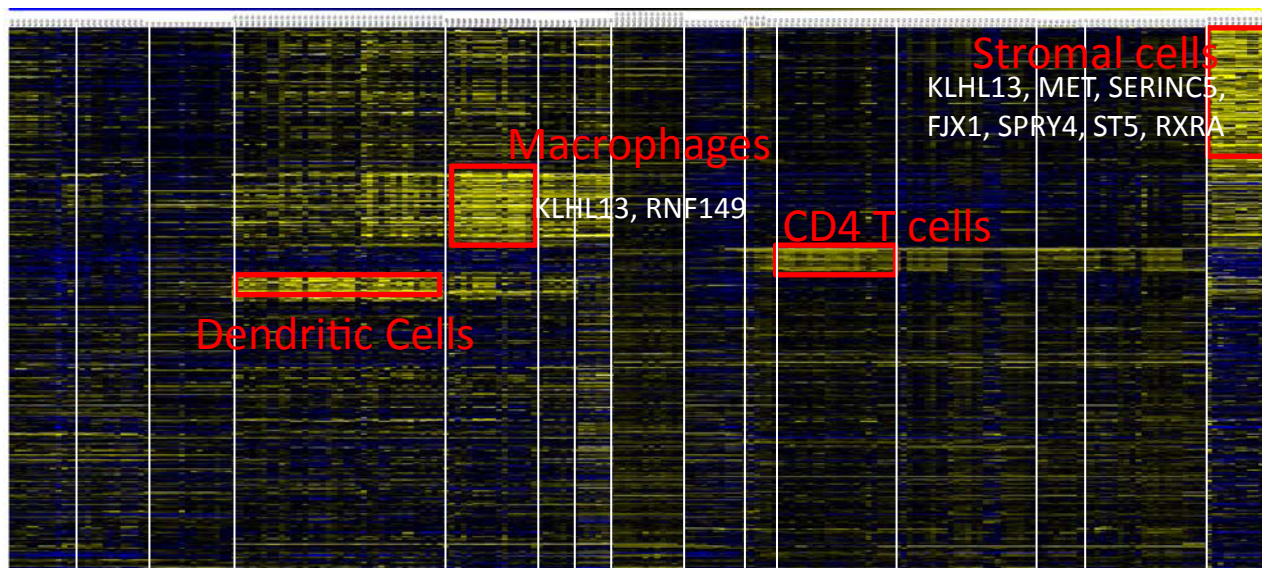

Stem Cells  
Pro-B Cells  
B Cells  
Dendritic Cells  
Macrophages  
Monocytes  
Neutrophils  
Nature Killer Cell  
Pre-T Cells  
CD4CD8 T Cells  
CD4 T Cells  
CD8 T Cells  
NK T Cells  
gd T Cells  
Stromal Cells

Figure S5

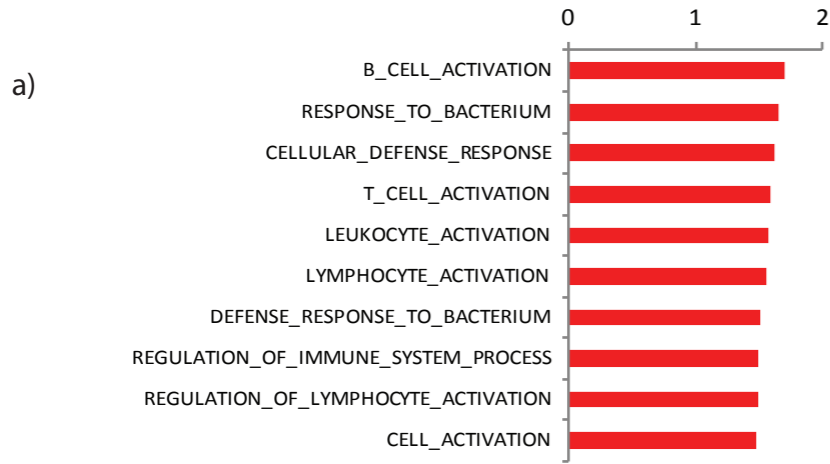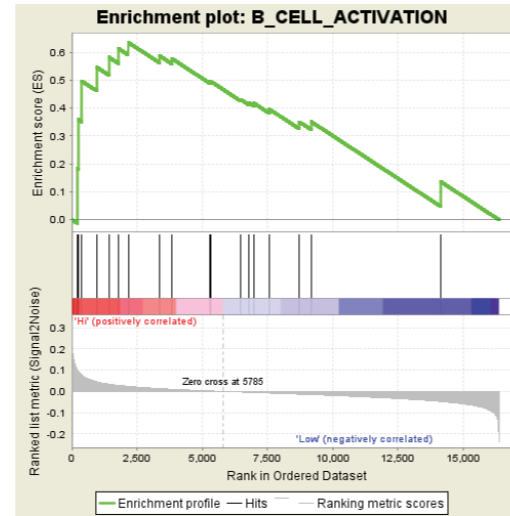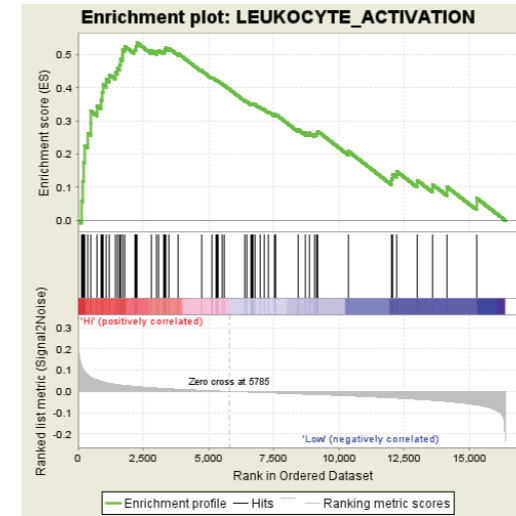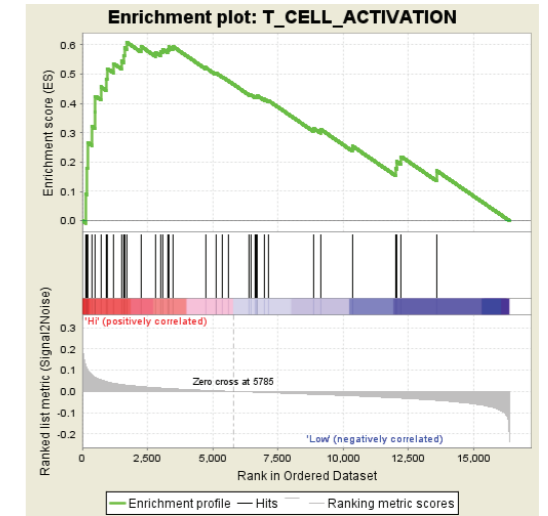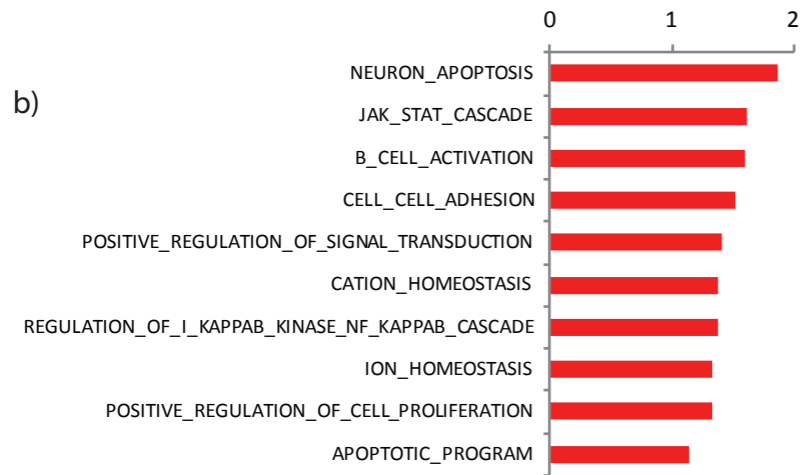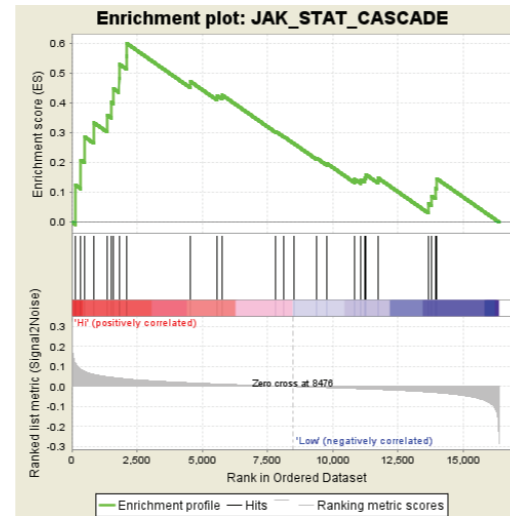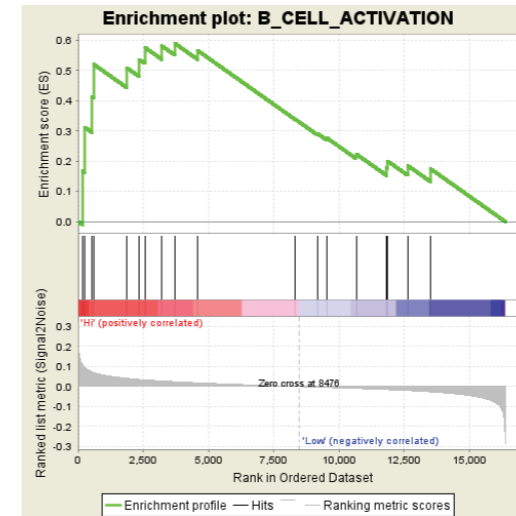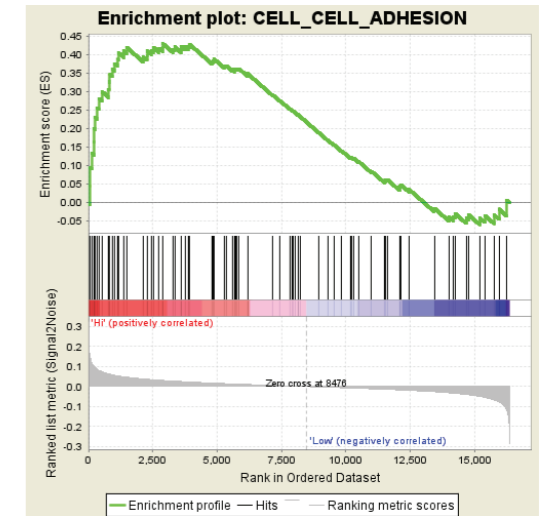

Figure S6

a)

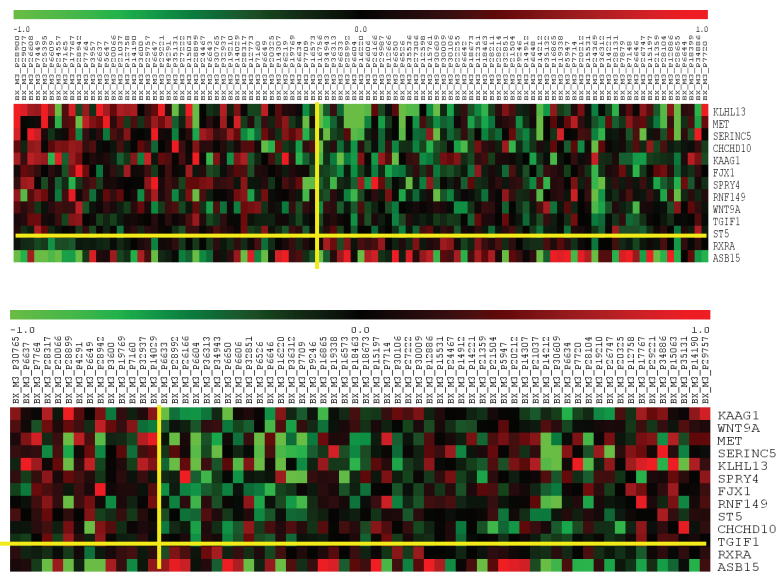

b)

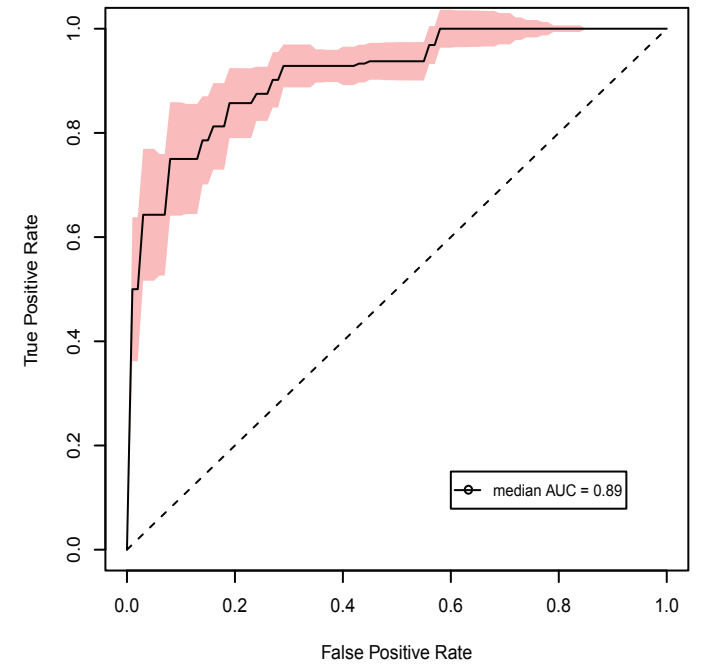

c)

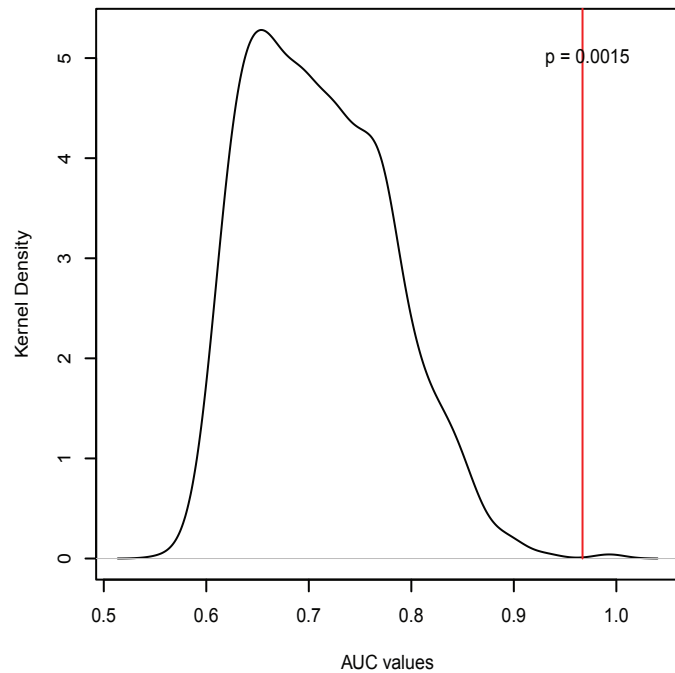

d)

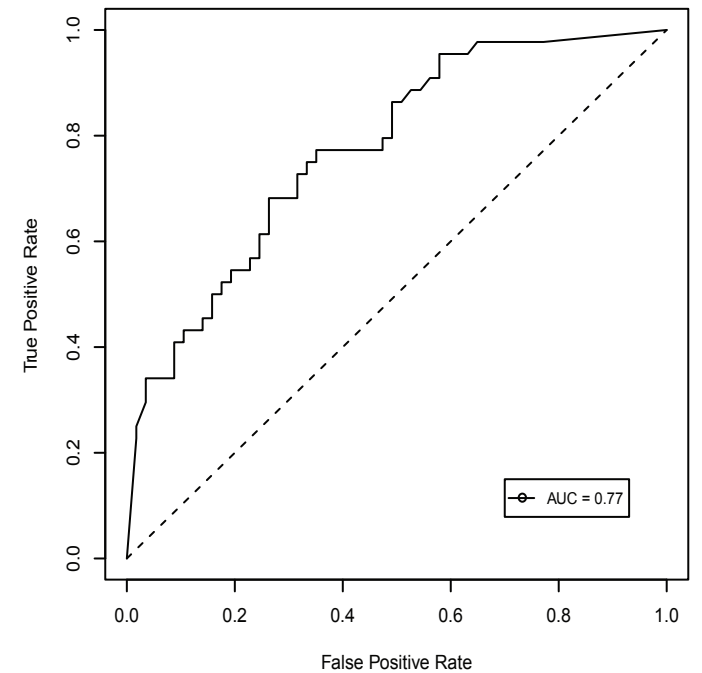

Figure S7

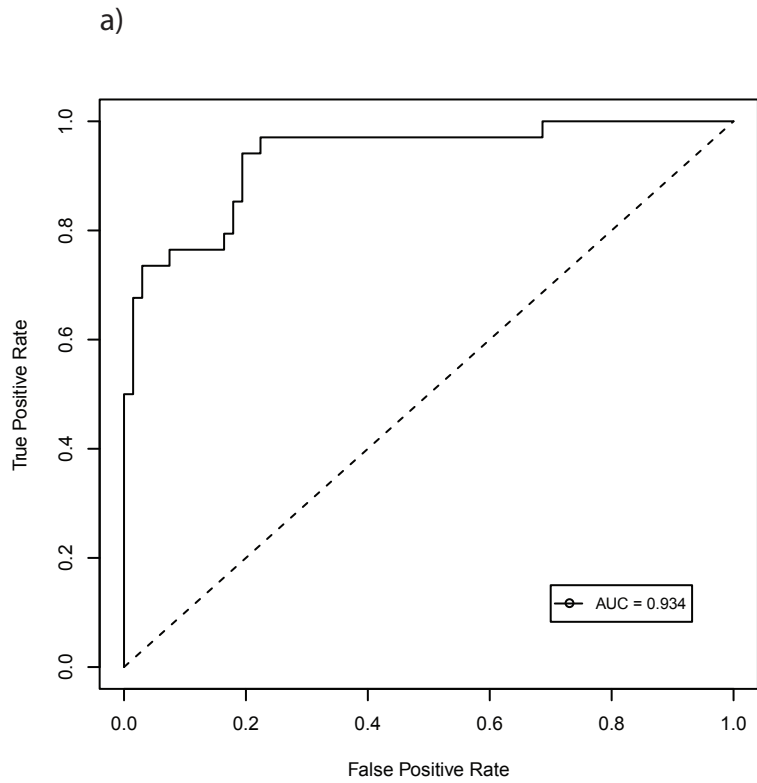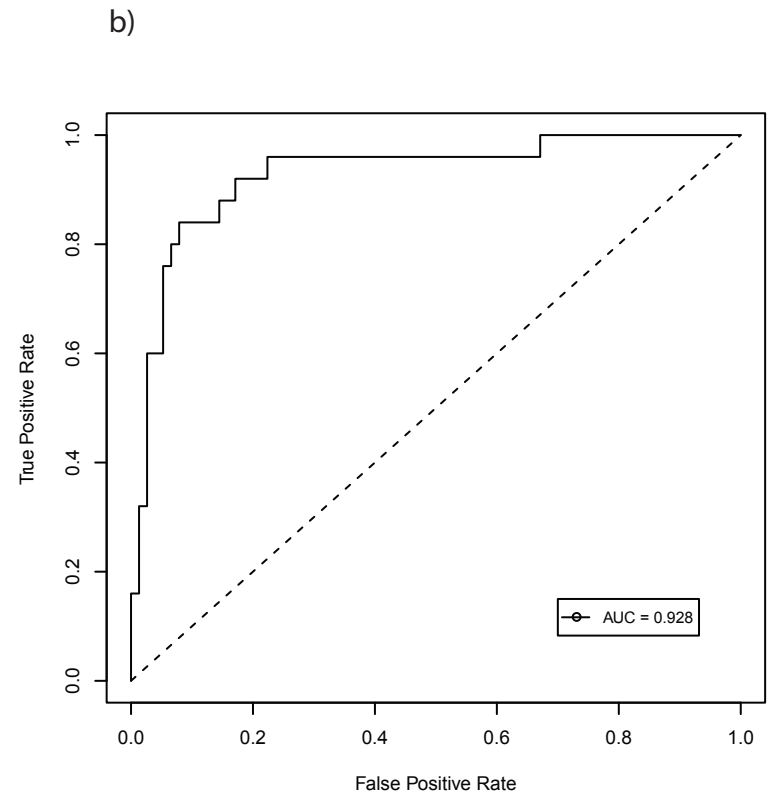

Figure S8

a)

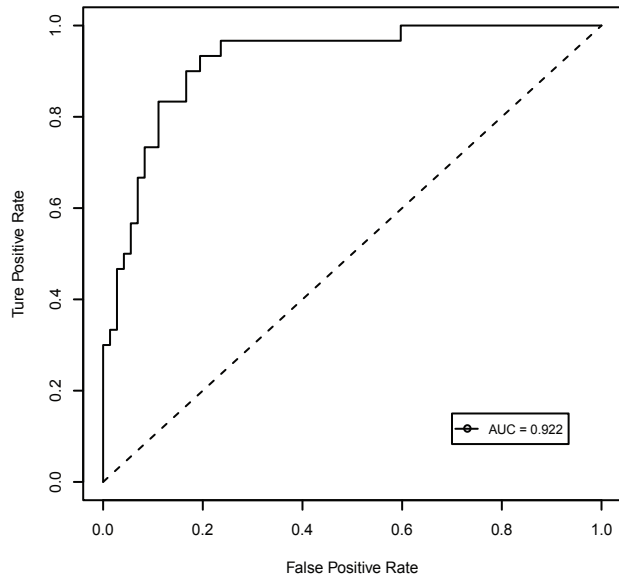

b)

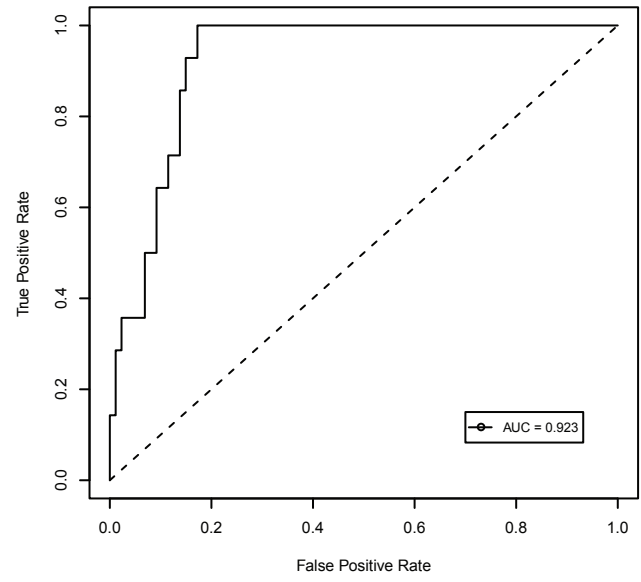

c)

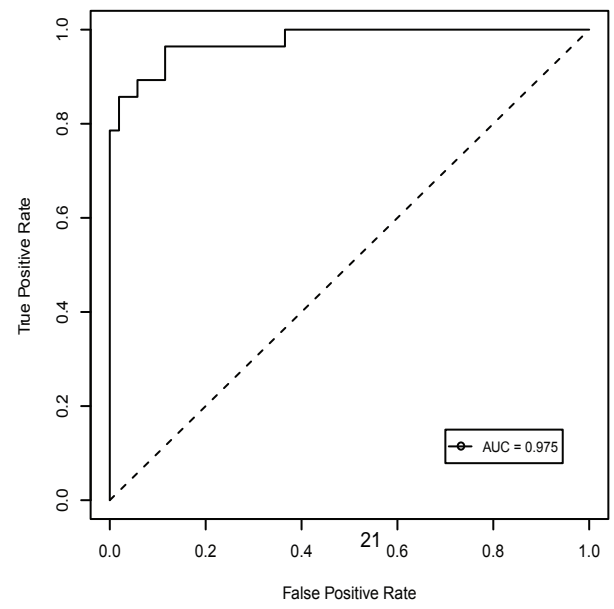

Figure S9

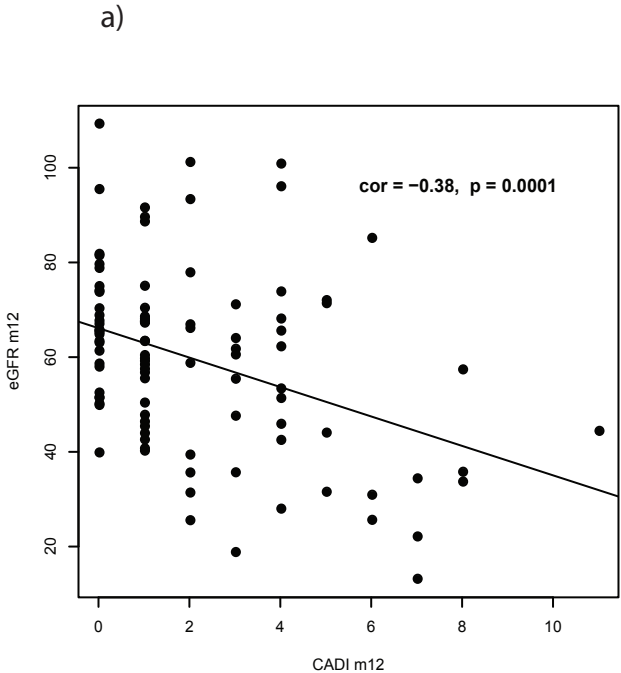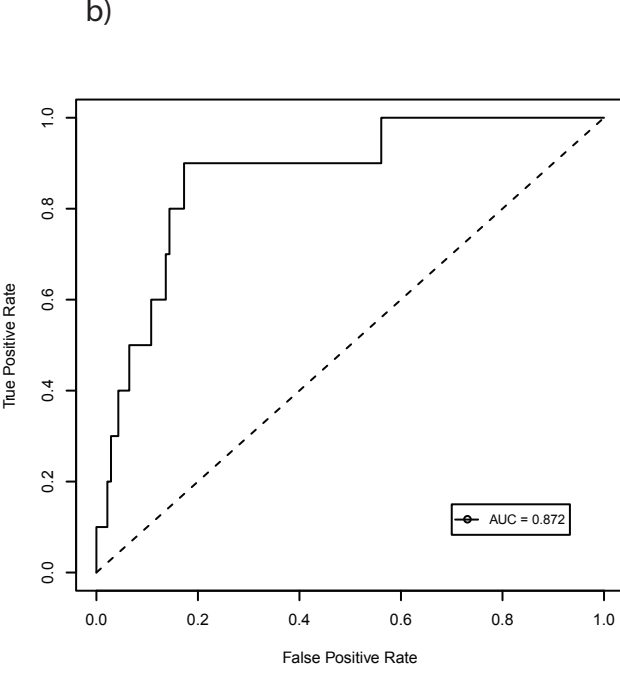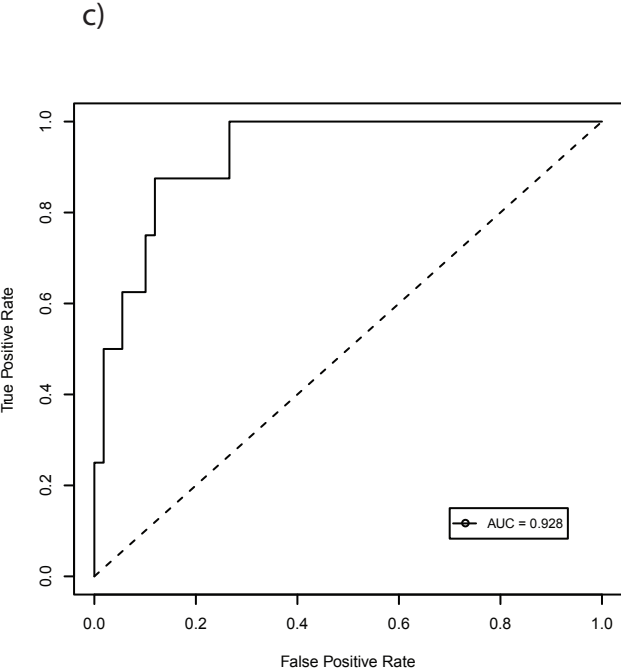



Figure S11

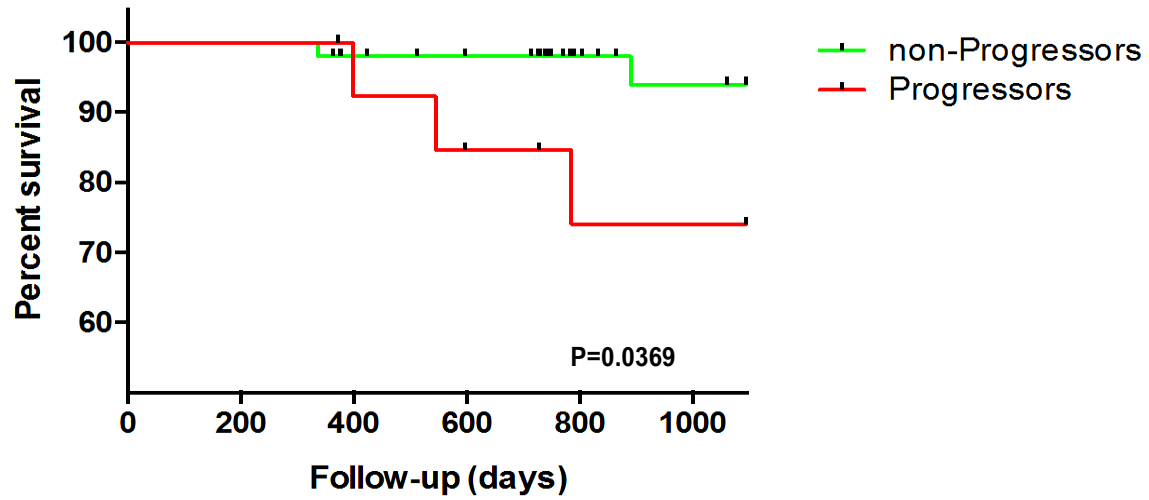

|                 |    |    |    |    |    |    |
|-----------------|----|----|----|----|----|----|
| Progressor:     | 14 | 14 | 13 | 11 | 8  | 7  |
| Non-progressor: | 52 | 52 | 48 | 45 | 28 | 22 |



**Table S1** : Baseline clinical and demographic characteristics for GoCAR patient cohorts.

| Characteristics:                     | Microarray patients<br>(n=101)<br>Mean ± SD (%) | RT-PCR patients<br>(n=45)<br>Mean ± SD (%) | *P-value |
|--------------------------------------|-------------------------------------------------|--------------------------------------------|----------|
| Recipient age                        | 46.90±12.38                                     | 46.81±11.52                                | 0.69     |
| Recipient race                       |                                                 |                                            | 0.96     |
| Caucasian                            | 66 (65.35)                                      | 33 (73.33)                                 |          |
| African American                     | 15 (14.85)                                      | 3 (6.67)                                   |          |
| Other                                | 20 (19.80)                                      | 9 (20.0)                                   |          |
| Recipient ESRD diagnosis             |                                                 |                                            | 0.63     |
| Diabetic nephropathy                 | 33 (32.67)                                      | 10 (22.22)                                 |          |
| Hypertension                         | 17 (16.83)                                      | 6 (13.33)                                  |          |
| Glomerulonephritis                   | 22 (21.78)                                      | 15 (33.33)                                 |          |
| Polycystic Kidney                    | 13 (12.87)                                      | 5 (11.11)                                  |          |
| Other                                | 16 (15.84)                                      | 9 (20.00)                                  |          |
| Donor age                            | 40.73±16.80                                     | 44.87±14.68                                | 0.16     |
| Donor race                           |                                                 |                                            | 0.72     |
| Caucasian                            | 80 (79.21)                                      | 42 (93.33)                                 |          |
| Non-Caucasian                        | 21 (20.79)                                      | 3 (6.67)                                   |          |
| h/o Delayed graft function           | 9 (8.91)                                        | 5 (11.11)                                  | 0.54     |
| Anti-HLA antibodies**                | 26 (26.8)                                       | 19 (42.2)                                  | 0.08     |
| Class-I                              | 26 (26.8)                                       | 19 (42.2)                                  |          |
| Class-II                             | 10 (9.9)                                        | 12 (26.7)                                  |          |
| 3-month eGFR-creatinine              | 59.48±18.11                                     | 59.27±18.91                                | 0.94     |
| 3-month Acute rejection <sup>#</sup> | 22 (21.7)                                       | 11 (28.94)                                 | 0.50     |
| High/low CADI-12                     | 44/57                                           | 18/27                                      | 0.72     |
| High CADI-12                         |                                                 |                                            | 0.68     |
| - Mean±SD                            | 4.21±2.09                                       | 4.00±2.09                                  |          |
| - Median(IQR)                        | 3 (2.75-5.0)                                    | 3 (2.75-5.0)                               |          |
| Low CADI-12                          |                                                 |                                            | 0.99     |
| - Mean±SD                            | 0.49±0.50                                       | 0.48±0.51                                  |          |
| - Median(IQR)                        | 0.0 (0.0-1.0)                                   | 0.0 (0.0-1.0)                              |          |

\*P-value by Unpaired T-test (or non-parametric) and, Chi-square/Fisher's exact test.

\*\* 97/101 & 38/45 patients had HLA antibodies measured.

**Table S2:** The 84 focus geneset

| ProbeID | Gene Symbc | Gene Description                                                | Cytoband   | mRNA Accessic | CADI Corr | Pvalue   |
|---------|------------|-----------------------------------------------------------------|------------|---------------|-----------|----------|
| 3040518 | MACC1      | metastasis associated in colon cancer 1                         | 7p21.1     | NM_182762     | 0.411     | 1.95E-05 |
| 3954887 | CHCHD10    | coiled-coil-helix-coiled-coil-helix domain containing 10        | 22q11.23   | NM_213720     | 0.404     | 2.85E-05 |
| 3464860 | DUSP6      | dual specificity phosphatase 6                                  | 12q22-q23  | NM_001946     | 0.391     | 5.20E-05 |
| 2761842 | PROM1      | prominin 1                                                      | 4p15.32    | NM_001145847  | 0.380     | 9.03E-05 |
| 2721959 | SLC34A2    | solute carrier family 34 (sodium phosphate), member 2           | 4p15.3-p15 | NM_001177995  | 0.375     | 1.11E-04 |
| 3596147 | GCNT3      | glucosaminyl (N-acetyl) transferase 3, mucin type               | 15q21.3    | NM_004751     | 0.373     | 1.22E-04 |
| 3796620 | DLGAP1     | discs, large (Drosophila) homolog-associated protein 1          | 18p11.3    | NM_004746     | 0.369     | 1.44E-04 |
| 4019160 | KLHL13     | kelch-like 13 (Drosophila)                                      | Xq23-q24   | NM_001168307  | 0.369     | 1.49E-04 |
| 3326826 | FJX1       | four jointed box 1 (Drosophila)                                 | 11p13      | NM_014344     | 0.367     | 1.60E-04 |
| 2868265 | LIX1       | Lix1 homolog (chicken)                                          | 5q15       | NM_153234     | 0.359     | 2.29E-04 |
| 3020192 | TES        | testis derived transcript (3 LIM domains)                       | 7q31.2     | NM_015641     | 0.357     | 2.51E-04 |
| 3020343 | MET        | met proto-oncogene (hepatocyte growth factor receptor)          | 7q31       | NM_001127500  | 0.352     | 3.01E-04 |
| 2583465 | ITGB6      | integrin, beta 6                                                | 2q24.2     | NM_000888     | 0.352     | 3.09E-04 |
| 3129065 | CLU        | clusterin                                                       | 8p21-p12   | NM_001831     | 0.349     | 3.46E-04 |
| 2344888 | CYR61      | cysteine-rich, angiogenic inducer, 61                           | 1p31-p22   | NM_001554     | 0.342     | 4.60E-04 |
| 3167110 | ANXA2P2    | annexin A2 pseudogene 2                                         | 9p13       | NR_003573     | 0.340     | 5.02E-04 |
| 2602770 | DNER       | delta/notch-like EGF repeat containing                          | 2q36.3     | NM_139072     | 0.340     | 5.02E-04 |
| 2825629 | TNFAIP8    | tumor necrosis factor, alpha-induced protein 8                  | 5q23.1     | NM_014350     | 0.338     | 5.45E-04 |
| 2974413 | MOXD1      | monooxygenase, DBH-like 1                                       | 6q23.1-q23 | NM_015529     | 0.328     | 8.11E-04 |
| 2864449 | SERINC5    | serine incorporator 5                                           | 5q14.1     | NM_001174077  | 0.318     | 0.0012   |
| 3108489 | LAPTM4B    | lysosomal protein transmembrane 4 beta                          | 8q22.1     | NM_018407     | 0.318     | 0.0012   |
| 3024025 | MEST       | mesoderm specific transcript homolog (mouse)                    | 7q32       | NM_002402     | 0.304     | 0.0020   |
| 3662041 | OGFOD1     | 2-oxoglutarate and iron-dependent oxygenase domain containing 1 | 16q12.2    | NM_018233     | 0.303     | 0.0021   |
| 3605395 | ADAMTSL3   | ADAMTS-like 3                                                   | 15q25.2    | NM_207517     | 0.300     | 0.0023   |
| 2876361 | PITX1      | paired-like homeodomain 1                                       | 5q31       | NM_002653     | 0.294     | 0.0028   |
| 3224087 | TTL11      | tubulin tyrosine ligase-like family, member 11                  | 9q33.2     | NM_001139447  | 0.287     | 0.0036   |
| 3872335 | ZNF416     | zinc finger protein 416                                         | 19q13.4    | NM_017879     | 0.287     | 0.0037   |
| 3332913 | TMEM216    | transmembrane protein 216                                       | 11q13.1    | NM_016499     | 0.286     | 0.0037   |
| 3888383 | SLC9A8     | solute carrier family 9 (sodium/hydrogen exchanger), member 8   | 20q13.13   | NM_015266     | 0.286     | 0.0037   |
| 2669979 | CX3CR1     | chemokine (C-X3-C motif) receptor 1                             | 3p21 3p21  | NM_001171177  | 0.284     | 0.0040   |
| 2486927 | ARHGAP25   | Rho GTPase activating protein 25                                | 2p13.3     | NM_014882     | 0.284     | 0.0040   |
| 2435218 | TDRKH      | tudor and KH domain containing                                  | 1q21       | NM_001083967  | 0.283     | 0.0041   |

|         |          |                                                                      |            |             |       |        |
|---------|----------|----------------------------------------------------------------------|------------|-------------|-------|--------|
| 2933392 | SYNJ2    | synaptojanin 2                                                       | 6q25.3     | NM_003898   | 0.281 | 0.0044 |
| 3431892 | SH2B3    | SH2B adaptor protein 3                                               | 12q24      | NM_005475   | 0.281 | 0.0044 |
| 2672140 | LTF      | lactotransferrin                                                     | 3p21.31    | NM_002343   | 0.281 | 0.0045 |
| 2567583 | RNF149   | ring finger protein 149                                              | 2q11.2     | NM_173647   | 0.280 | 0.0046 |
| 3734648 | SLC16A5  | solute carrier family 16, member 5 (monocarboxylic acid transporte   | 17q25.1    | NM_004695   | 0.277 | 0.0050 |
| 3726154 | ITGA3    | integrin, alpha 3 (antigen CD49C, alpha 3 subunit of VLA-3 receptor) | 17q21.33   | NM_002204   | 0.272 | 0.0060 |
| 3850445 | CDKN2D   | cyclin-dependent kinase inhibitor 2D (p19, inhibits CDK4)            | 19p13      | NM_001800   | 0.272 | 0.0060 |
| 2899437 | BTN2A1   | butyrophilin, subfamily 2, member A1                                 | 6p22.1     | NM_078476   | 0.270 | 0.0062 |
| 2879105 | SPRY4    | sprouty homolog 4 (Drosophila)                                       | 5q31.3     | NM_030964   | 0.270 | 0.0062 |
| 3623717 | FLJ10038 | hypothetical protein FLJ10038                                        | 15q21.2    | NR_026891   | 0.267 | 0.0070 |
| 3168938 | POLR1E   | polymerase (RNA) I polypeptide E, 53kDa                              | 9p13.2     | NM_022490   | 0.266 | 0.0072 |
| 2714132 | PDE6B    | phosphodiesterase 6B, cGMP-specific, rod, beta                       | 4p16.3     | NM_000283   | 0.263 | 0.0078 |
| 2356142 | LIX1L    | Lix1 homolog (mouse)-like                                            | 1q21.1     | NM_153713   | 0.263 | 0.0080 |
| 3232349 | PFKP     | phosphofructokinase, platelet                                        | 10p15.3-p1 | NM_002627   | 0.261 | 0.0084 |
| 2931391 | MTHFD1L  | methylenetetrahydrofolate dehydrogenase (NADP+ dependent) 1-li       | 6q25.1     | NM_015440   | 0.259 | 0.0089 |
| 3960061 | RAC2     | ras-related C3 botulinum toxin substrate 2 (rho family, small GTP bi | 22q13.1    | NM_002872   | 0.259 | 0.0089 |
| 3261009 | KAZALD1  | Kazal-type serine peptidase inhibitor domain 1                       | 10q24.31   | NM_030929   | 0.255 | 0.0099 |
| 2315918 | ATAD3C   | ATPase family, AAA domain containing 3C                              | 1p36.33    | NM_00103921 | 0.254 | 0.0103 |
| 3820443 | ICAM1    | intercellular adhesion molecule 1                                    | 19p13.3-p1 | NM_000201   | 0.253 | 0.0108 |
| 2374982 | RNPEP    | arginyl aminopeptidase (aminopeptidase B)                            | 1q32       | NM_020216   | 0.252 | 0.0109 |
| 3405587 | GPRC5A   | G protein-coupled receptor, family C, group 5, member A              | 12p13-p12  | NM_003979   | 0.250 | 0.0115 |
| 3270270 | PTPRE    | protein tyrosine phosphatase, receptor type, E                       | 10q26      | NM_006504   | 0.247 | 0.0126 |
| 2359885 | SLC27A3  | solute carrier family 27 (fatty acid transporter), member 3          | 1q21.3     | NM_024330   | 0.247 | 0.0127 |
| 3415320 | KRT7     | keratin 7                                                            | 12q12-q13  | NM_005556   | 0.246 | 0.0130 |
| 2414958 | TACSTD2  | tumor-associated calcium signal transducer 2                         | 1p32-p31   | NM_002353   | 0.246 | 0.0130 |
| 3868998 | NKG7     | natural killer cell group 7 sequence                                 | 19q13.41   | NM_005601   | 0.245 | 0.0136 |
| 2361342 | SEMA4A   | sema domain, immunoglobulin domain (Ig), transmembrane domai         | 1q22       | NM_022367   | 0.245 | 0.0137 |
| 3776504 | TGIF1    | TGFB-induced factor homeobox 1                                       | 18p11.3    | NM_170695   | 0.244 | 0.0140 |
| 3028217 | ---      | ---                                                                  | ---        | AK303101    | 0.243 | 0.0143 |
| 2881187 | CSF1R    | colony stimulating factor 1 receptor                                 | 5q33-q35   | NM_005211   | 0.242 | 0.0146 |
| 2898441 | KAAG1    | kidney associated antigen 1                                          | 6p22.1     | NM_181337   | 0.240 | 0.0154 |
| 3056264 | ABHD11   | abhydrolase domain containing 11                                     | 7q11.23    | NR_026912   | 0.240 | 0.0156 |
| 2621881 | P4HTM    | prolyl 4-hydroxylase, transmembrane (endoplasmic reticulum)          | 3p21.31    | NM_177938   | 0.237 | 0.0168 |
| 3185593 | BSPRY    | B-box and SPRY domain containing                                     | 9q32       | NM_017688   | 0.237 | 0.0169 |

|         |           |                                                                      |             |              |        |        |
|---------|-----------|----------------------------------------------------------------------|-------------|--------------|--------|--------|
| 2369484 | TOR3A     | torsin family 3, member A                                            | 1q25.2      | NM_022371    | 0.237  | 0.0171 |
| 2787902 | GYPE      | glycophorin E (MNS blood group)                                      | 4q31.1      | NM_198682    | 0.237  | 0.0172 |
| 3738471 | RAC3      | ras-related C3 botulinum toxin substrate 3 (rho family, small GTP bi | 17q25.3     | NM_005052    | 0.234  | 0.0186 |
| 2692319 | ADCY5     | adenylate cyclase 5                                                  | 3q13.2-q21  | NM_183357    | 0.233  | 0.0192 |
| 3361971 | ST5       | suppression of tumorigenicity 5                                      | 11p15       | NM_005418    | 0.232  | 0.0197 |
| 3865998 | PNMAL1    | PNMA-like 1                                                          | 19q13.32    | NM_018215    | 0.220  | 0.0270 |
| 2407985 | HEYL      | hairy/enhancer-of-split related with YRPW motif-like                 | 1p34.3      | NM_014571    | 0.219  | 0.0275 |
| 2323899 | UBXN10    | UBX domain protein 10                                                | 1p36.12     | NM_152376    | 0.216  | 0.0300 |
| 2459352 | WNT9A     | wingless-type MMTV integration site family, member 9A                | 1q42        | NM_003395    | 0.212  | 0.0332 |
| 3051655 | VOPP1     | vesicular, overexpressed in cancer, prosurvival protein 1            | 7p11.2      | NM_030796    | 0.210  | 0.0353 |
| 3635903 | LOC388152 | hypothetical LOC388152                                               | 15q25.2     | BC054509     | -0.213 | 0.0327 |
| 3394412 | THY1      | Thy-1 cell surface antigen                                           | 11q22.3-q22 | NM_006288    | -0.234 | 0.0184 |
| 3907507 | C20orf165 | chromosome 20 open reading frame 165                                 | 20q13.12    | NM_080608    | -0.239 | 0.0160 |
| 3021696 | ASB15     | ankyrin repeat and SOCS box-containing 15                            | 7q31.31     | NM_080928    | -0.263 | 0.0079 |
| 3645901 | NAT15     | N-acetyltransferase 15 (GCN5-related, putative)                      | 16p13.3     | NM_024845    | -0.264 | 0.0078 |
| 2942578 | CCDC90A   | coiled-coil domain containing 90A                                    | 6p24.3-p23  | NM_001031713 | -0.272 | 0.0059 |
| 3193339 | RXRA      | retinoid X receptor, alpha                                           | 9q34.3      | NM_002957    | -0.300 | 0.0023 |
| 3305801 | SORCS1    | sortilin-related VPS10 domain containing receptor 1                  | 10q23-q25   | NM_052918    | -0.306 | 0.0019 |

Table S3a: Multivariate analysis of high CADI-12 prediction with clinical/pathological variables only

| <b>Terms</b>                                   | <b>OR</b> | <b>lower</b> | <b>upper</b> | <b>pvalue</b> |
|------------------------------------------------|-----------|--------------|--------------|---------------|
| Donor_Age                                      | 1.023     | -0.015       | 0.061        | 0.2331        |
| Recipient Race<br>(Caucasian vs Non-Caucasian) | 1.486     | -0.742       | 1.534        | 0.4901        |
| Recipient Gender                               | 0.601     | -1.627       | 0.583        | 0.3574        |
| Deceased_donor                                 | 1.323     | -1.233       | 1.773        | 0.7116        |
| ECD_kidney                                     | 0.321     | -3.548       | 1.238        | 0.3397        |
| CIT_min                                        | 1.001     | -0.001       | 0.004        | 0.1794        |
| Induction_Therapy                              | 0.774     | -1.432       | 0.904        | 0.6631        |
| Anti_HLA_Ab                                    | 0.856     | -1.387       | 1.022        | 0.7973        |
| Delayed_Graft_Function                         | 1.719     | -1.473       | 2.669        | 0.5912        |
| HLA_Mismatch                                   | 1.202     | -0.111       | 0.500        | 0.2242        |
| m3_eGFR                                        | 0.971     | -0.065       | 0.001        | 0.0552        |
| pre_or_m3_ACR                                  | 2.977     | -0.085       | 2.342        | 0.0690        |
| CADI-3                                         | 1.212     | -0.171       | 0.590        | 0.3058        |

\*N=83 patients have complete demographic, clinical and pathological data

Table S3b: Multivariate analysis of high CADI-12 prediction with clinical/ pathological variables and the geneset

| <b>Terms</b>                                   | <b>OR</b> | <b>lower</b> | <b>upper</b> | <b>pvalue</b> |
|------------------------------------------------|-----------|--------------|--------------|---------------|
| Donor_Age                                      | 0.997     | 0.931        | 1.066        | 0.9341        |
| Recipient Race<br>(Caucasian vs Non-Caucasian) | 0.464     | 0.041        | 3.186        | 0.4433        |
| Recipient Gender                               | 0.709     | 0.113        | 6.838        | 0.7079        |
| Deceased_donor                                 | 1.231     | 0.099        | 15.878       | 0.8621        |
| ECD_kidney                                     | 0.319     | 0.003        | 14.644       | 0.5771        |
| CIT_min                                        | 1.001     | 0.998        | 1.006        | 0.4830        |
| Induction_Therapy                              | 1.214     | 0.168        | 10.472       | 0.8444        |
| Anti_HLA_Ab                                    | 0.215     | 0.010        | 1.652        | 0.1463        |
| Delayed_Graft_Function                         | 0.213     | 0.001        | 5.963        | 0.4057        |
| HLA_Mismatch                                   | 1.021     | 0.575        | 1.989        | 0.9400        |
| m3_eGFR                                        | 0.960     | 0.871        | 1.016        | 0.1696        |
| pre_or_m3_ACR                                  | 2.732     | 0.345        | 31.021       | 0.3319        |
| CADI-3                                         | 1.466     | 0.721        | 3.608        | 0.2921        |
| Geneset                                        | 621.774   | 49.955       | 9.74E+04     | 1.06E-10      |

\*N=83 patients have complete demographic, clinical and pathological data

**Table S4:** CADI subscore comparisons between 12-month progressors/non-progressors

| Parameter | 3-month                |                            |          | 12-month               |                            |          |
|-----------|------------------------|----------------------------|----------|------------------------|----------------------------|----------|
|           | Progressors<br>Mean±SD | Non-Progressors<br>Mean±SD | *p-value | Progressors<br>Mean±SD | Non-Progressors<br>Mean±SD | *p-value |
| CADI      | 1.36±1.28              | 1.07±1.06                  | 0.45     | 5.50±2.56              | 1.25±1.17                  | <0.0001  |
| ct-score  | 0.38±0.50              | 0.46±0.50                  | 0.75     | 1.71±0.91              | 0.56±0.50                  | <0.0001  |
| cv-score  | 0.22±0.67              | 0.22±0.59                  | 0.95     | 0.91±1.09              | 0.19±0.55                  | 0.0025   |
| ci-score  | 0.15±0.38              | 0.15±0.41                  | 0.99     | 1.93±1.07              | 0.21±0.45                  | <0.0001  |
| i-score   | 0.07±0.27              | 0.02±0.14                  | 0.36     | 0.35±0.74              | 0.07±0.43                  | 0.0439   |
| mm-score  | 0.0±0.0                | 0.02±0.1                   | 0.99     | 0.14±0.53              | 0.04±0.28                  | 0.39     |
| g-score   | 0.45±0.82              | 0.17±0.61                  | 0.09     | 0.35±0.74              | 0.08±0.44                  | 0.0478   |

\*Mann-Whitney test

**Table S5a: Multivariate analysis of m12 progressor prediction with clinical parameters and geneset**

| Terms                           | OR    | lower  | upper  | pvalue |
|---------------------------------|-------|--------|--------|--------|
| Donor_Age                       | 1.020 | -0.025 | 0.073  | 0.3869 |
| Race:Caucasian vs Non-Caucasian | 2.686 | -0.698 | 2.860  | 0.2477 |
| Gender                          | 0.421 | -2.607 | 0.708  | 0.2797 |
| Deceased_donor                  | 4.036 | -0.609 | 3.910  | 0.1791 |
| ECD_kidney                      | 0.188 | -5.168 | 1.446  | 0.2938 |
| CIT_min                         | 1.001 | -0.001 | 0.004  | 0.3131 |
| Induction_Therapy               | 0.983 | -1.658 | 1.761  | 0.9833 |
| Anti_HLA_Ab                     | 0.245 | -3.581 | 0.358  | 0.1227 |
| Delayed_Graft_Function          | 0.217 | -4.557 | 0.878  | 0.2236 |
| HLA_Mismatch                    | 0.992 | -0.508 | 0.463  | 0.9731 |
| m3_eGFR                         | 0.951 | -0.116 | -0.002 | 0.0425 |
| pre_or_m3_ACR                   | 5.795 | 0.118  | 3.691  | 0.0353 |
| m3_CADI                         | 0.626 | -1.346 | 0.244  | 0.2040 |

\*N=63 patients have complete demographic, clinical and pathological data

**Table S5b: Multivariate analysis of m12 progressor prediction with clinical parameters and geneset**

| Terms                           | OR       | lower  | upper    | pvalue |
|---------------------------------|----------|--------|----------|--------|
| Donor_Age                       | 0.993    | 0.911  | 1.068    | 0.8191 |
| Race:Caucasian vs Non-Caucasian | 0.529    | 0.021  | 6.518    | 0.6238 |
| Gender                          | 0.449    | 0.026  | 8.293    | 0.5410 |
| Deceased_donor                  | 2.093    | 0.066  | 148.439  | 0.6640 |
| ECD_kidney                      | 0.233    | 0.003  | 9.497    | 0.4440 |
| CIT_min                         | 1.001    | 0.998  | 1.005    | 0.6260 |
| Induction_Therapy               | 0.992    | 0.102  | 18.526   | 0.9942 |
| Anti_HLA_Ab                     | 0.349    | 0.028  | 3.138    | 0.3361 |
| Delayed_Graft_Function          | 0.079    | 0.000  | 2.887    | 0.2004 |
| HLA_Mismatch                    | 0.836    | 0.306  | 1.558    | 0.5506 |
| m3_eGFR                         | 0.934    | 0.809  | 0.991    | 0.0200 |
| pre_or_m3_ACR                   | 2.133    | 0.254  | 30.003   | 0.4591 |
| m3_CADI                         | 0.530    | 0.114  | 1.432    | 0.2261 |
| Generisk                        | 5.84E+03 | 23.237 | 3.25E+09 | 0.0002 |

\*N=63 patients have complete demographic, clinical and pathological data

**Table S5c: Multivariate analysis of m24 progressor prediction with clinical parameters and geneset**

| <b>Terms</b>                    | <b>OR</b> | <b>lower</b> | <b>upper</b> | <b>pvalue</b> |
|---------------------------------|-----------|--------------|--------------|---------------|
| Donor_Age                       | 0.993     | -0.057       | 0.042        | 0.7850        |
| Race:Caucasian vs Non-Caucasian | 0.525     | -2.106       | 0.740        | 0.3601        |
| Gender                          | 1.315     | -1.050       | 1.642        | 0.6826        |
| Deceased_donor                  | 0.606     | -3.013       | 1.872        | 0.6784        |
| ECD_kidney                      | 0.649     | -4.509       | 2.914        | 0.8043        |
| CIT_min                         | 1.000     | -0.002       | 0.003        | 0.6818        |
| Induction_Therapy               | 0.441     | -2.256       | 0.541        | 0.2389        |
| Anti_HLA_Ab                     | 1.186     | -1.493       | 1.783        | 0.8340        |
| Delayed_Graft_Function          | 2.057     | -1.780       | 3.125        | 0.5504        |
| HLA_Mismatch                    | 1.086     | -0.304       | 0.498        | 0.6746        |
| m3_eGFR                         | 0.980     | -0.068       | 0.021        | 0.3413        |
| pre_or_m3_ACR                   | 2.062     | -0.795       | 2.260        | 0.3428        |
| m3_CADI                         | 1.058     | -1.033       | 1.146        | 0.9179        |

\*N=50 patients have complete demographic, clinical and pathological data

**Table S5d: Multivariate analysis of m24 progressor prediction with clinical parameters and geneset**

| <b>Terms</b>                    | <b>OR</b> | <b>lower</b> | <b>upper</b> | <b>pvalue</b> |
|---------------------------------|-----------|--------------|--------------|---------------|
| Donor_Age                       | 0.941     | 0.785        | 1.050        | 0.2601        |
| Race:Caucasian vs Non-Caucasian | 0.127     | 0.001        | 1.534        | 0.1051        |
| Gender                          | 4.554     | 0.395        | 1.38E+04     | 0.2425        |
| Deceased_donor                  | 0.012     | 4.26E-07     | 3.046        | 0.1184        |
| ECD_kidney                      | 0.034     | 6.85E-08     | 99.226       | 0.4065        |
| CIT_min                         | 1.003     | 1.000        | 1.011        | 0.0889        |
| Induction_Therapy               | 0.198     | 0.001        | 2.772        | 0.2090        |
| Anti_HLA_Ab                     | 7.356     | 0.219        | 740.253      | 0.2903        |
| Delayed_Graft_Function          | 3.797     | 0.001        | 3.42E+04     | 0.7457        |
| HLA_Mismatch                    | 1.341     | 0.533        | 3.168        | 0.4341        |
| m3_eGFR                         | 0.974     | 0.848        | 1.093        | 0.6251        |
| pre_or_m3_ACR                   | 2.934     | 0.080        | 674.514      | 0.4715        |
| m3_CADI                         | 3.393     | 0.311        | 251.299      | 0.2903        |
| Generisk                        | 7.51E+03  | 56.185       | 3.98E+12     | 2.22E-06      |

\*N=50 patients have complete demographic, clinical and pathological data



**Table S6:** Association of 10 principle components of 13 geneset with graft loss in Cox proportional hazard model

|             | <b>coef</b> | <b>exp(coef)</b> | <b>se(coef)</b> | <b>z</b> | <b>p</b> |   |
|-------------|-------------|------------------|-----------------|----------|----------|---|
| <b>PC1</b>  | -5.592      | 3.73E-03         | 29.95           | -0.1867  | 0.8500   |   |
| <b>PC2</b>  | -7.413      | 6.03E-04         | 6.37            | -1.1642  | 0.2400   |   |
| <b>PC3</b>  | -2.874      | 5.65E-02         | 8.23            | -0.3494  | 0.7300   |   |
| <b>PC4</b>  | -14.75      | 3.93E-07         | 5               | -2.9512  | 0.0032   | * |
| <b>PC5</b>  | 0.783       | 2.19E+00         | 4.02            | 0.1948   | 0.8500   |   |
| <b>PC6</b>  | 13.701      | 8.92E+05         | 5.45            | 2.5141   | 0.0120   | * |
| <b>PC7</b>  | 6.738       | 8.44E+02         | 4.11            | 1.6389   | 0.1000   |   |
| <b>PC8</b>  | 0.224       | 1.25E+00         | 3.72            | 0.0601   | 0.9500   |   |
| <b>PC9</b>  | -0.749      | 4.73E-01         | 4.95            | -0.1513  | 0.8800   |   |
| <b>PC10</b> | 4.418       | 8.29E+01         | 4.07            | 1.0853   | 0.2800   |   |

Likelihood ratio test=20.1 on 10 df, p=0.0287 n= 159, number of events= 11

**Table S7:** Association of demographic or clinical variables with graft loss in Cox proportional hazard mode

| Variable                                           | Coef    | Exp(coef) | SE(coef) | Z      | P      |
|----------------------------------------------------|---------|-----------|----------|--------|--------|
| m3_eGFR                                            | -0.016  | 0.984     | 0.027    | -0.598 | 0.5500 |
| pre_or_m3_ACR                                      | 2.475   | 11.877    | 1.186    | 2.086  | 0.0370 |
| CADI-3                                             | -0.329  | 0.720     | 0.264    | -1.245 | 0.2100 |
| CIT_min                                            | 2.6E-04 | 1.000     | 0.001    | 0.263  | 0.7900 |
| Deceased_donor<br>(yes vs no)                      | 1.439   | 4.218     | 1.434    | 1.003  | 0.3200 |
| Anti_HLA_Ab                                        | -0.719  | 0.487     | 1.162    | -0.619 | 0.5400 |
| Induction_Type<br>(yes vs no)                      | 0.233   | 1.263     | 1.207    | 0.193  | 0.8500 |
| Recipient Race<br>(Caucasian vs non-<br>Caucasian) | -1.150  | 0.317     | 1.004    | -1.146 | 0.2500 |
| Donor Age                                          | 5.3E-03 | 1.005     | 0.024    | 0.217  | 0.8300 |
| HLA mismatch                                       | -0.051  | 0.950     | 0.470    | -0.108 | 0.9100 |
| Delayed Graft Function                             | 1.028   | 2.797     | 0.979    | 1.051  | 0.2900 |

Anti\_HLA\_Ab : Yes (donor specific antigen or non dsa antibody), No : no antibody

Induction type: Yes (Lymphocyte Depletion or Lymphocyte Non-Depletion); No; Induction

Likelihood ratio test=11.5 on 11 df, p=0.4010 n= 120, number of events= 7

**Table S8:** Validation of the GoCAR gene set in other kidney transplant cohorts.

| <b>Data Set</b> | <b>Genechip / Platform</b>  | <b>Sample Size</b> | <b>Outcome</b> | <b>AUC</b> | <b>Ref.</b> |
|-----------------|-----------------------------|--------------------|----------------|------------|-------------|
| Dataset 1       | Affymetrix<br>U133 Plus 2.0 | 282                | Allograft loss | 0.83       | 9           |
| Dataset 2       | Affymetrix<br>U133 Plus 2.0 | 24                 | CADI           | 0.972      | 10          |

## Reference

1. Solez K, Colvin RB, Racusen LC, Haas M, Sis B, Mengel M, et al. Banff 07 classification of renal allograft pathology: updates and future directions. *Am J Transplant*. 2008 Apr;8(4):753-60.
2. Yilmaz S, Tomlanovich S, Mathew T, Taskinen E, Paavonen T, Navarro M, et al. Protocol core needle biopsy and histologic Chronic Allograft Damage Index (CADI) as surrogate end point for long-term graft survival in multicenter studies. *J Am Soc Nephrol*. 2003 Mar;14(3):773-9.
3. Yilmaz S, McLaughlin K, Paavonen T, Taskinen E, Monroy M, Aavik E, et al. Clinical predictors of renal allograft histopathology: a comparative study of single-lesion histology versus a composite, quantitative scoring system. *Transplantation*. 2007 Mar 27;83(6):671-6.
4. Irizarry RA, Bolstad BM, Collin F, Cope LM, Hobbs B, Speed TP. Summaries of Affymetrix GeneChip probe level data. *Nucleic Acids Res*. 2003 Feb 15;31(4):e15.
5. Johnson WE, Li C, Rabinovic A. Adjusting batch effects in microarray expression data using empirical Bayes methods. *Biostatistics*. 2007 Jan;8(1):118-27.
6. Mootha VK, Lindgren CM, Eriksson KF, Subramanian A, Sihag S, Lehar J, et al. PGC-1alpha-responsive genes involved in oxidative phosphorylation are coordinately downregulated in human diabetes. *Nat Genet*. 2003 Jul;34(3):267-73.
7. Subramanian A, Tamayo P, Mootha VK, Mukherjee S, Ebert BL, Gillette MA, et al. Gene set enrichment analysis: a knowledge-based approach for interpreting genome-wide expression profiles. *Proc Natl Acad Sci U S A*. 2005 Oct 25;102(43):15545-50.
8. Firth D. Bias Reduction of Maximum Likelihood Estimates. *Biometrika*. 1993;80(1):12.
9. Heinze G, Ploner M. Fixing the nonconvergence bug in logistic regression with SPLUS and SAS. *Comput Methods Programs Biomed*. 2003 Jun;71(2):181-7.
10. Bair E, Tibshirani R. Semi-supervised methods to predict patient survival from gene expression data. *PLoS Biol*. 2004 Apr;2(4):E108.

11. Zhang B, Gaiteri C, Bodea LG, Wang Z, McElwee J, Podtelezhnikov AA, et al. Integrated systems approach identifies genetic nodes and networks in late-onset Alzheimer's disease. *Cell*. 2013 Apr 25;153(3):707-20.
12. Einecke G, Reeve J, Sis B, Mengel M, Hidalgo L, Famulski KS, et al. A molecular classifier for predicting future graft loss in late kidney transplant biopsies. *J Clin Invest*. 2010 Jun;120(6):1862-72.
13. Naesens M, Khatri P, Li L, Sigdel TK, Vitalone MJ, Chen R, et al. Progressive histological damage in renal allografts is associated with expression of innate and adaptive immunity genes. *Kidney Int*. 2011 Dec;80(12):1364-76.
